# Supplementary material
Source: PubMed Central journal article supplement (PMC2929296)

## **Pd-Catalyzed Carbonylative Conjugate Addition of Dialkylzinc Reagents to Unsaturated Carbonyls**

Daniel W. Custar, Hai Le, and James P. Morken\*

*Department of Chemistry, Merkert Chemistry Center, Boston College, Chestnut Hill, MA 02467*

### **Supporting Information**

#### **Table of Contents**

|                                                                                           |             |
|-------------------------------------------------------------------------------------------|-------------|
| <b>General Information</b> .....                                                          | <i>SI-2</i> |
| <b>Experimental Procedures</b> .....                                                      | <i>SI-2</i> |
| I. Procedure for Conjugate Addition of Solid $\alpha,\beta$ -Unsaturated Carbonyls.....   | <i>SI-2</i> |
| II. Procedure for Conjugate Addition of Liquid $\alpha,\beta$ -Unsaturated Carbonyls..... | <i>SI-3</i> |
| III. Full Characterization.....                                                           | <i>SI-3</i> |
| <b>Spectral Data</b> .....                                                                | <i>SI-8</i> |
| $^1\text{H}$ and $^{13}\text{C}$ NMR Spectra.....                                         | <i>SI-8</i> |

## General Information

$^1\text{H}$  NMR spectra were recorded on Varian Unity Inova 500 MHz and Varian Gemini 400 MHz spectrometers. Chemical shifts are reported in ppm with the solvent resonance as the internal standard ( $\text{CDCl}_3$ : 7.24 ppm,  $\text{C}_6\text{D}_6$ : 7.16 ppm). Data are reported as follows: chemical shift, multiplicity (s = singlet, d = doublet, t = triplet, q = quartet, p = pentet, sept = septet, b = broad, m = multiplet), coupling constants (Hz) and integration.  $^{13}\text{C}\{^1\text{H}\}$  NMR spectra were recorded on Varian Unity Inova 500 MHz (125 MHz) and Varian Gemini 400 MHz (100 MHz) spectrometers. Chemical shifts are reported in ppm with the solvent resonance as the internal standard ( $\text{CDCl}_3$ : 77.00 ppm,  $\text{C}_6\text{D}_6$ : 128.0 ppm). Infrared (IR) spectra were recorded on a Bruker  $\alpha$ -P Spectrometer. Frequencies are reported in wavenumbers ( $\text{cm}^{-1}$ ). High-resolution mass spectrometry (HRMS) and low-resolution mass spectrometry (ESI) was performed at Boston College, Chestnut Hill, MA.

Liquid chromatography was performed using forced flow (flash chromatography) on silica gel ( $\text{SiO}_2$ , 230 x 450 Mesh) purchased from Silicycle. Thin layer chromatography was performed on 25  $\mu\text{m}$  silica gel glass backed plates from Silicycle. Visualization was performed using ultraviolet light (254 nm), ceric ammonium molybdate (CAM), and potassium permanganate ( $\text{KMnO}_4$ ).

All reactions were conducted in oven- or flame-dried glassware under an inert atmosphere of nitrogen or argon. Tetrahydrofuran and dichloromethane were purified using Pure Solv MD-4 solvent purification system, from Innovative Technology, Inc., by passing the solvent through two activated alumina columns after being purged with argon. Trimethylsilyl chloride, *trans*-2-nonenal, cinnamaldehyde, 3-methyl-2-butenal, 2-methyl-2-pentenal, *trans*-1-phenyl-2-buten-1-one, isovaleraldehyde, and benzaldehyde were distilled from calcium hydride. Triphenylphosphine was recrystallized from ethanol. Methyl 4-(3-oxo-3-phenyl-1-propenyl)benzoate, 4-chlorochalcone, 4-methoxychalcone were purchased from Acros Organics. Triethylsilyl chloride was purchased from Gelest, Inc. and used without further purification. Acetic acid was purchased from Fisher Scientific and used without further purification. Tris(dibenzylideneacetone)dipalladium (0) and tricyclohexylphosphine were purchased from Strem Chemicals, Inc. and used without further purification. Triphenylsilyl chloride, diphenylmethylsilyl chloride, dimethylphenylsilyl chloride, tetrabutylammonium fluoride, *trans*-4-phenyl-3-buten-2-one, cyclohexenone, 4,4-dimethyl-2-cyclohexenone, 4-hexen-3-one were purchased from Aldrich and used without further purification.

## Experimental Procedures

### *I. Representative Procedure for Conjugate Addition with Solid $\alpha,\beta$ -Unsaturated Carbonyls.*

In the glove box,  $\text{Pd}_2(\text{dba})_3$  (6.9 mg, 7.5  $\mu\text{mol}$ ) and triphenylphosphine (4.7 mg, 18  $\mu\text{mol}$ ) were added to an oven-dried roundbottom flask charged with a magnetic stir bar. The flask was sealed with a rubber septum, removed from the dry box, and placed under atmosphere of argon. To the flask was added tetrahydrofuran (1.0 mL) and was allowed to stir for 30 minutes. Next, CO (balloon) was added to the mixture and the mixture was vented for one minute; the vent was closed and freshly distilled trimethylsilyl chloride (88  $\mu\text{L}$ , 690  $\mu\text{mol}$ ) was added followed by a solution of chalcone (62.5 mg, 300  $\mu\text{mol}$ ) in tetrahydrofuran (1.0 mL). The mixture was stirred for 10 minutes prior to dropwise addition of diethyl zinc (44  $\mu\text{L}$ , 390  $\mu\text{mol}$ ). The mixture was then allowed to stir for 3 hours under a CO (g) atmosphere. It was then passed through a plug of

SiO<sub>2</sub> (60% diethyl ether/hexanes). The material was concentrated *in vacuo* by rotary evaporation and then diluted with tetrahydrofuran (4.2 mL). The mixture was cooled to 0 °C and treated with acetic acid (26 μL, 450 μmol) and TBAF (450 μL, 450 μmol, 1.0 M in THF). The reaction mixture stirred for 10 minutes and was quenched with saturated aqueous sodium bicarbonate and the organic layer was separated. The aqueous layer was washed with diethyl ether (5 X 5 mL). The combined organic layers were dried over MgSO<sub>4</sub>, filtered, and concentrated by rotary evaporation. The crude reaction mixture was purified on silica gel (15% diethyl ether/hexanes) to afford a clear, colorless oil (67.9 mg, 85.0% yield).

### 11. Representative Procedure for Conjugate Addition with Liquid $\alpha,\beta$ -Unsaturated Carbonyls.

In the glove box, Pd<sub>2</sub>(dba)<sub>3</sub> (6.9 mg, 7.5 μmol) and triphenylphosphine (4.7 mg, 18 μmol) were added to an oven-dried roundbottom flask charged with a magnetic stir bar. The flask was sealed with a rubber septum, removed from the dry box, and placed under atmosphere of argon. To the flask was added tetrahydrofuran (2.0 mL) and was allowed to stir for 30 minutes. Next, CO (balloon) was added to the mixture and the mixture was vented for one minute; the vent was closed and freshly distilled trimethylsilyl chloride (88 μL, 690 μmol) was added and followed by a solution of *trans*-2-nonenal (50.0 μL, 300 μmol). The mixture was stirred for 10 minutes prior to dropwise addition of diethyl zinc (44 μL, 390 μmol). The mixture was then allowed to stir for 4 hours under a CO(g) atmosphere. It was then passed through a plug of SiO<sub>2</sub> (60% diethyl ether/hexanes). The material was concentrated *in vacuo* by rotary evaporation and then diluted with tetrahydrofuran (4.2 mL). The mixture was cooled to 0 °C and treated with acetic acid (26 μL, 450 μmol) and TBAF (450 μL, 450 μmol, 1.0 M in THF). The reaction mixture stirred for 10 minutes and was quenched with saturated aqueous sodium bicarbonate and the organic layer was separated. The aqueous layer was washed with diethyl ether (5 X 5 mL). The combined organic layers were dried over MgSO<sub>4</sub>, filtered, and concentrated by rotary evaporation. The crude reaction mixture was purified on silica gel (15% diethyl ether/hexanes) to afford a clear, colorless oil (46.4 mg, 78.0% yield).

### III. Full Characterization

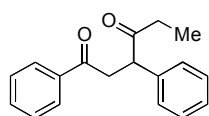

**1,3-diphenylhexane-1,4-dione (Compound S-1):** Purified on SiO<sub>2</sub> (15% diethyl ether/hexanes, stain in CAM) to afford a colorless oil. <sup>1</sup>H NMR (400 MHz, CDCl<sub>3</sub>) δ 7.94 (bd, J = 8.3 Hz, 2H); 7.52 (tt, J = 6.7, 1.2 Hz, 1H); 7.44-7.39 (m, 2H); 7.35-7.31 (m, 2H); 7.28-7.24 (m, 2H); 4.42 (dd, J = 10.2, 3.5 Hz, 1H); 4.03 (dd, J = 18.0, 10.2 Hz, 1H); 3.11 (dd, J = 18.0, 3.5 Hz, 1H); 2.64 (dq, J = 18.0, 7.4 Hz, 1H); 2.50 (dq, J = 18.0, 7.2 Hz, 1H); 1.00 (t, J = 7.2 Hz, 3H); <sup>13</sup>C NMR (100 MHz, CDCl<sub>3</sub>) δ 210.5, 198.7, 138.8, 137.0, 133.2, 129.2, 129.1, 129.0, 128.6, 127.6, 53.5, 42.4, 35.2, 8.0; IR (neat) 3028, 1715, 1683, 1398, 753, 700, 690; HRMS (ESI+) for C<sub>18</sub>H<sub>18</sub>O<sub>2</sub> [M+H]<sup>+</sup>: calculated: 267.1385, found: 267.1385.

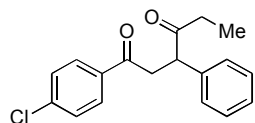

**1-(4-chlorophenyl)-3-phenylhexane-1,4-dione (Compound S-2):** Purified on SiO<sub>2</sub> (10% diethyl ether/hexanes, stain in CAM) to afford a clear oil. <sup>1</sup>H NMR (500 MHz, CDCl<sub>3</sub>) δ 7.90 (bd, J = 6.9 Hz, 2H); 7.42 (bd,

$J = 6.8$  Hz, 2H); 7.37-7.34 (m, 2H); 7.30-7.27 (m, 3H); 4.42 (dd,  $J = 10.0, 4.0$  Hz, 1H); 4.01 (dd,  $J = 17.9, 10.1$  Hz, 1H); 3.08 (dd,  $J = 18.1, 3.7$  Hz, 1H); 2.63 (dq,  $J = 17.9, 7.4$  Hz, 1H); 2.51 (dq,  $J = 18.1, 7.3$  Hz, 1H); 1.02 (t,  $J = 7.3$  Hz, 3H);  $^{13}\text{C}$  NMR (125 MHz,  $\text{CDCl}_3$ )  $\delta$  209.8, 197.0, 139.6, 138.1, 134.8, 129.5, 129.1, 128.8, 128.2, 127.6, 53.0, 42.3, 34.9, 7.8; IR (neat) 1714, 1683, 1589, 1400, 1090, 992, 835, 755, 700; HRMS (ESI+) for  $\text{C}_{18}\text{H}_{17}\text{ClO}_2$  [M]: calculated: 301.0995, found 301.0999.

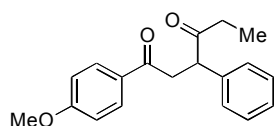

**1-(4-methoxyphenyl)-3-phenylhexane-1,4-dione (Compound S-3):**

Purified on  $\text{SiO}_2$  (10% diethyl ether/hexanes, stain in CAM) to afford a pale yellow oil.  $^1\text{H}$  NMR (500 MHz,  $\text{CDCl}_3$ )  $\delta$  7.94 (bd,  $J = 9.1$  Hz, 2H); 7.36-7.34 (m, 2H); 7.33-7.26 (m, 3H); 6.91 (bd,  $J = 9.0$  Hz, 2H); 4.42 (dd,  $J = 10.2, 3.6$  Hz, 1H); 4.00 (dd,  $J = 17.9, 10.3$  Hz, 1H); 3.85 (s, 3H); 3.11 (dd,  $J = 17.8, 3.6$  Hz, 1H); 2.66 (dq,  $J = 17.9, 7.4$  Hz, 1H); 2.52 (dq,  $J = 17.9, 7.4$  Hz, 1H); 1.02 (t,  $J = 7.1$  Hz, 3H);  $^{13}\text{C}$  NMR (125 MHz,  $\text{CDCl}_3$ )  $\delta$  210.0, 196.7, 163.5, 138.4, 130.3, 129.6, 129.0, 128.3, 127.4, 113.7, 55.4, 53.0, 42.2, 35.0, 7.8; IR (neat) 1714, 1683, 1580, 1533, 1510, 1249, 1180, 1030, 1002, 655, 631; HRMS (ESI+) for  $\text{C}_{19}\text{H}_{20}\text{O}_3$  [M+1]: calculated: 297.1490, found 297.1498.

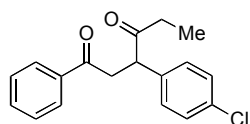

**3-(4-chlorophenyl)-1-phenylhexane-1,4-dione (Compound S-4):**

Purified on  $\text{SiO}_2$  (10% diethyl ether/hexanes, stain in CAM) to afford a white solid. mp= 100-102 °C;  $^1\text{H}$  NMR (400 MHz,  $\text{CDCl}_3$ )  $\delta$  7.92 (bd,  $J = 8.2$  Hz, 2H); 7.52 (tt,  $J = 6.7, 1.4$  Hz, 1H); 7.41 (bt,  $J = 8.0$  Hz, 2H); 7.30-7.27 (m, 2H); 7.22-7.19 (m, 2H); 4.38 (dd,  $J = 10.0, 3.7$  Hz, 1H); 3.98 (dd,  $J = 18.2, 10.2$  Hz, 1H); 3.10 (dd,  $J = 18.0, 3.9$  Hz, 1H); 2.63 (dq,  $J = 18.0, 7.2$  Hz, 1H); 2.48 (dq,  $J = 18.0, 7.3$  Hz, 1H); 0.99 (t,  $J = 7.3$  Hz, 3H);  $^{13}\text{C}$  NMR (100 MHz,  $\text{CDCl}_3$ )  $\delta$  209.5, 197.8, 136.7, 136.3, 133.4, 133.2, 129.6, 129.2, 128.5, 128.0, 52.2, 42.3, 35.1, 7.8; IR (neat) 2916, 1714, 1681, 1480, 1237, 1110, 1019, 748, 689; HRMS (ESI+) for  $\text{C}_{18}\text{H}_{17}\text{ClO}_2$  [M]: calculated: 301.0995, found: 301.0994.

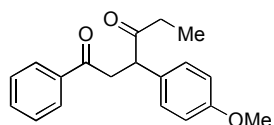

**3-(4-methoxyphenyl)-1-phenylhexane-1,4-dione (Compound S-5):**

Purified on  $\text{SiO}_2$  (10% diethyl ether/hexanes, stain in CAM) to afford a white solid. mp= 89-90 °C.  $^1\text{H}$  NMR (400 MHz,  $\text{CDCl}_3$ )  $\delta$  7.87 (bd,  $J = 8.3$  Hz, 2H); 7.52 (tt,  $J = 6.7, 1.4$  Hz, 1H); 7.36 (bt,  $J = 7$  Hz, 2H); 7.12 (bd,  $J = 7.8$  Hz, 2H); 6.80 (bd,  $J = 7.8$  Hz, 2H); 4.35 (dd,  $J = 10.2, 3.8$  Hz, 1H); 3.98 (dd,  $J = 18.0, 10.2$  Hz, 1H); 3.77 (s, 3H); 3.08 (dd,  $J = 18.0, 3.9$  Hz, 1H); 2.63 (dq,  $J = 18.0, 7.4$  Hz, 1H); 2.49 (dq,  $J = 18.0, 7.5$  Hz, 1H); 0.99 (t,  $J = 7.2$  Hz, 3H);  $^{13}\text{C}$  NMR (100 MHz,  $\text{CDCl}_3$ )  $\delta$  210.2, 198.3, 158.9, 136.5, 133.1, 130.2, 129.3, 128.5, 128.0, 114.4, 55.2, 52.0, 42.4, 34.8, 7.8; IR (neat) 2973, 2936, 1714, 1683, 1609, 1510, 1249, 1116, 993, 690, 681; LRMS (ESI+) for  $\text{C}_{19}\text{H}_{20}\text{O}_3$  [M+H]: calculated: 297.2, found: 297.2.

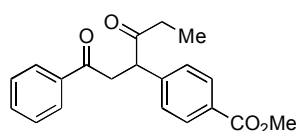

**Methyl 4-(1,4-dioxo-1-phenylhexan-3-yl)benzoate (Compound S-6):**

Purified on  $\text{SiO}_2$  (10% diethyl ether/hexanes, stain in CAM) to afford a pale yellow solid. mp= 85-87 °C  $^1\text{H}$  NMR (400 MHz,  $\text{CDCl}_3$ )  $\delta$  7.97 (bd,  $J = 8.2$  Hz, 2H); 7.90 (bd,  $J = 8.4$  Hz, 2H); 7.50 (tt,  $J = 4.8, 1.2$  Hz, 1H); 7.39 (bt,  $J = 7.8$  Hz, 2H); 7.33 (bd,  $J = 8.3$  Hz, 2H); 4.46 (dd,  $J = 10.0, 3.7$  Hz, 1H); 4.01 (dd,  $J = 18.0, 10.2$  Hz, 1H); 3.86 (s, 3H); 3.12 (dd,  $J = 18.0, 4.0$  Hz, 1H); 2.63 (dq,  $J = 18.0, 7.2$

Hz, 1H); 2.45 (dq,  $J = 18.0, 7.3$  Hz, 1H); 0.97 (t,  $J = 7.3$  Hz, 3H);  $^{13}\text{C}$  NMR (100 MHz,  $\text{CDCl}_3$ )  $\delta$  209.2, 197.7, 166.6, 143.4, 136.2, 133.3, 130.3, 129.4, 128.5, 128.3, 128.0, 52.9, 52.1, 42.2, 35.2, 7.7; IR (neat) 2918, 1714, 1681, 1608, 1414, 1276, 1110, 762, 748, 706, 689; HRMS (ESI+) for  $\text{C}_{20}\text{H}_{20}\text{O}_4$  [M+H]: calculated: 325.1440, found: 325.1448.

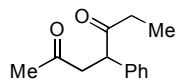

**4-phenylheptane-2,5-dione (Compound S-7):** Purified on  $\text{SiO}_2$  (10% diethyl ether/hexanes, stain in CAM) to afford a colorless oil.  $^1\text{H}$  NMR (500 MHz,  $\text{CDCl}_3$ )  $\delta$  7.54-7.42 (m, 5H); 4.46 (dd,  $J = 10.4, 4.0$  Hz, 1H); 3.71 (dd,  $J = 18.0, 10.4$  Hz, 1H); 2.81 (dd,  $J = 18.0, 3.7$  Hz, 1H); 2.71 (dq,  $J = 17.8, 3.4$  Hz, 2H); 2.39 (s, 3H); 1.20 (t,  $J = 7.4$  Hz, 3H);  $^{13}\text{C}$  NMR (100 MHz,  $\text{CDCl}_3$ )  $\delta$  209.8, 206.7, 138.1, 129.0, 128.1, 127.4, 52.9, 46.6, 34.7, 29.8, 7.7; IR (neat) 2963, 1711, 1515, 1491, 1356, 850, 749, 701, 690; LRMS (ESI+) for  $\text{C}_{13}\text{H}_{16}\text{O}_2$  [M+H]: calculated: 205.1, found: 205.1.

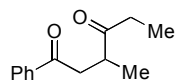

**3-methyl-1-phenylhexane-1,4-dione (Compound S-8):** Purified on  $\text{SiO}_2$  (10% diethyl ether/hexanes, stain in CAM) to afford a colorless oil.  $^1\text{H}$  NMR (500 MHz,  $\text{CDCl}_3$ )  $\delta$  7.92 (bd,  $J = 8.2$  Hz, 2H); 7.52 (tt,  $J = 6.7, 1.4$  Hz, 1H); 7.41 (bt,  $J = 7.8$  Hz, 2H); 3.52 (dd,  $J = 18.0, 9.0$  Hz, 1H); 3.25-3.17 (m, 1H); 2.91 (dd,  $J = 18.0, 4.5$  Hz, 1H); 2.64 (dq,  $J = 7.2, 1.8$  Hz, 2H); 1.15 (d,  $J = 7.2$  Hz, 3H); 1.06 (t,  $J = 7.3$  Hz, 3H);  $^{13}\text{C}$  NMR (100 MHz,  $\text{CDCl}_3$ )  $\delta$  214.4, 199.0, 136.9, 133.8, 129.1, 128.4, 42.5, 41.8, 35.1, 17.7, 8.0; IR (neat) 3061, 1712, 1683, 1458, 1353, 1216, 749, 690; HRMS (ESI+) for  $\text{C}_{13}\text{H}_{16}\text{O}_2$  [M+H]: calculated: 205.1229, found: 205.1220.

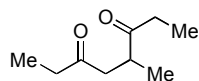

**4-methyloctane-3,6-dione (Compound S-9):** Purified on  $\text{SiO}_2$  (10% diethyl ether/hexanes, stain in CAM) to afford a colorless oil.  $^1\text{H}$  NMR (400 MHz,  $\text{CDCl}_3$ )  $\delta$  2.95-2.86 (m, 1H); 2.81 (dd,  $J = 17.6, 9.4$  Hz, 1H); 2.43 (dq,  $J = 7.4, 1.0$  Hz, 2H); 2.36-2.18 (m, 3H); 0.93 (d,  $J = 7.1$  Hz, 3H); 0.90 (t,  $J = 7.3$  Hz, 3H); 0.88 (t,  $J = 7.5$  Hz, 3H);  $^{13}\text{C}$  NMR (100 MHz,  $\text{CDCl}_3$ )  $\delta$  214.5, 210.0, 45.7, 40.9, 36.0, 34.6, 17.1, 7.9, 7.8; IR (neat) 2974, 1710, 1459, 1376, 1356, 1116; HRMS (ESI+) for  $\text{C}_9\text{H}_{16}\text{O}_2$  [M+H]: calculated: 157.1229, found: 157.1234.

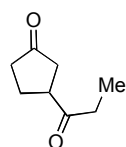

**3-propionylcyclopentanone (Compound S-10):** Purified on  $\text{SiO}_2$  (10% diethyl ether/hexanes, stain in CAM) to afford a colorless oil.  $^1\text{H}$  NMR (400 MHz,  $\text{CDCl}_3$ )  $\delta$  3.22 (pentet,  $J = 8.5$  Hz, 1H); 2.59 (dq,  $J = 18.0, 7.2$  Hz, 1H); 2.58-2.42 (m, 2H); 2.36-2.10 (m, 4H); 1.96 (ddt,  $J = 16.8, 9.6, 8.2$  Hz, 1H); 1.05 (dd,  $J = 7.2, 7.2$  Hz, 3H);  $^{13}\text{C}$  NMR (100 MHz,  $\text{CDCl}_3$ )  $\delta$  217.1, 211.9, 47.9, 40.8, 37.9, 34.9, 26.7, 7.9; IR (neat) 2974, 1739, 1705, 1459, 1406, 1374, 1138, 1113; HRMS (ESI+) for  $\text{C}_9\text{H}_{14}\text{O}_2$  [M+H]: calculated: 141.0915, found: 141.0912.

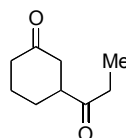

**3-propionylcyclohexanone (Compound S-11):** Purified on  $\text{SiO}_2$  (10% diethyl ether/hexanes, stain in CAM) to afford a colorless oil.  $^1\text{H}$  NMR (400 MHz,  $\text{CDCl}_3$ )  $\delta$  2.85 (tt,  $J = 11.0, 4.3$  Hz, 1H); 2.55 (dq,  $J = 18.8, 7.2$  Hz, 1H); 2.53-2.24 (m, 5H); 2.09-1.99 (m, 2H); 1.76-1.62 (m, 2H); 1.03 (t,  $J = 7.2$  Hz, 3H);  $^{13}\text{C}$  NMR (100 MHz,  $\text{CDCl}_3$ )  $\delta$  211.0, 209.9, 49.8, 42.5, 40.8, 34.1, 27.3, 24.8, 7.5; IR (neat) 2939, 1708,

1450, 1417, 1224, 1123, 964; HRMS (ESI+) for C<sub>9</sub>H<sub>14</sub>O<sub>2</sub> [M+H]: calculated: 155.1072, found: 155.1066.

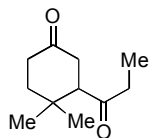

**4,4-dimethyl-3-propionylcyclohexanone (Compound S-12):** Purified on SiO<sub>2</sub> (10% diethyl ether/hexanes, stain in CAM) to afford a colorless oil. <sup>1</sup>H NMR (400 MHz, CDCl<sub>3</sub>) δ 2.81 (dd, J = 8.8, 4.9 Hz, 1H); 2.52 (dq, J = 18.4, 7.3 Hz, 1H); 2.50-2.33 (m, 3H); 2.30-2.19 (m, 2H); 1.81 (ddd, J = 12.7, 6.1, 6.1 Hz, 1H); 1.57 (ddd, J = 14.6, 9.2, 5.6 Hz, 1H); 1.10 (s, 3H); 1.05 (s, 3H); 0.98 (dd, J = 7.2, 7.2 Hz, 3H); <sup>13</sup>C NMR (100 MHz, CDCl<sub>3</sub>) δ 212.5, 209.8, 57.1, 39.9, 38.4, 37.5, 33.0, 28.8, 23.3, 7.8; IR (neat) 2958, 1712, 1458, 1415, 1369, 1144; HRMS (ESI+) for C<sub>11</sub>H<sub>18</sub>O<sub>2</sub> [M+H]: calculated: 183.1385, found: 183.1390.

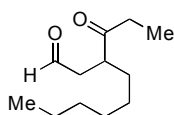

**3-propionylnonanal (Compound S-13):** Purified on SiO<sub>2</sub> (15% diethyl ether/hexanes, stain in CAM) to afford a colorless oil. <sup>1</sup>H NMR (500 MHz, CDCl<sub>3</sub>) δ 9.74 (s, 1H); 3.06-2.94 (m, 2H); 2.66-2.52 (m, 2H); 2.49 (dd, J = 17.9, 3.5 Hz, 1H); 1.63-1.56 (m, 1H); 1.44-1.36 (m, 1H); 1.30-1.27 (m, 8H); 1.07 (t, J = 7.1 Hz, 3H); 0.88 (t, J = 6.9 Hz, 3H); <sup>13</sup>C NMR (125 MHz, CDCl<sub>3</sub>) δ 213.3, 200.7, 45.1, 44.9, 35.3, 31.6, 31.5, 29.2, 27.0, 22.5, 13.9, 7.6; IR (neat) 2935, 2927, 1709, 1459, 1390, 1109, 741, 735; HRMS (ESI+) for C<sub>12</sub>H<sub>22</sub>O<sub>2</sub> [M+H]: calculated: 199.1698, found: 199.1702.

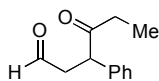

**4-oxo-3-phenylhexanal (Compound S-14):** Purified on SiO<sub>2</sub> (15% diethyl ether/hexanes, stain in CAM) to afford a colorless oil. <sup>1</sup>H NMR (500 MHz, CDCl<sub>3</sub>) δ 9.80 (s, 1H); 7.40-7.20 (m, 5H); 4.13 (dd, J = 9.7, 5.2 Hz, 1H); 3.27 (dd, J = 17.6, 10.0 Hz, 1H); 2.56 (dd, J = 17.4, 5.2 Hz, 1H); 2.41 (dq, J = 18.0, 7.7 Hz, 2H); 0.98 (t, J = 7.2 Hz, 3H); <sup>13</sup>C NMR (100 MHz, CDCl<sub>3</sub>) δ 209.2, 200.0, 137.8, 129.1, 128.1, 127.6, 51.8, 46.8, 34.6, 7.8; IR (neat) 2976, 1712, 1493, 1454, 1120, 755, 701; LRMS (ESI+) for C<sub>12</sub>H<sub>14</sub>O<sub>2</sub> [M+H]: calculated: 191.2, found: 191.2.

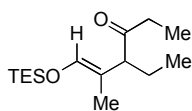

**trans-4-ethyl-5-methyl-6-(triethylsilyloxy)hex-5-en-3-one (Compound S-15):** Purified on SiO<sub>2</sub> (5% diethyl ether/hexanes, stain in CAM) to afford a colorless oil. <sup>1</sup>H NMR (400 MHz, CDCl<sub>3</sub>) δ 6.22 (s, 1H); 2.86 (dd, J = 7.0, 7.0 Hz, 1H); 2.64 (dq, J = 17.5, 7.3 Hz, 1H); 2.40 (dq, J = 17.5, 7.5 Hz, 1H); 1.82 (dtd, J = 14.6, 7.2, 7.2 Hz, 1H); 1.62-1.51 (m, 1H); 1.54 (s, 3H); 1.12-1.08 (m, 3H); 1.08 (t, J = 7.6 Hz, 9H); 0.87 (t, J = 7.2 Hz, 3H); 0.76 (q, J = 8.2 Hz, 6H); <sup>13</sup>C NMR (100 MHz, CDCl<sub>3</sub>) δ 212.0, 137.9, 115.0, 57.4, 34.0, 21.1, 11.9, 9.8, 7.9, 6.6, 4.6; IR (neat) 2958, 2877, 1712, 1660, 1235, 1169, 1125, 1005; HRMS (ESI+) for C<sub>15</sub>H<sub>30</sub>O<sub>2</sub>Si [M+H]: calculated: 271.2093, found: 271.2095.

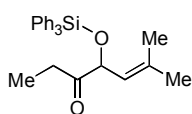

**6-methyl-4-(triphenylsilyloxy)hept-5-en-3-one (Compound S-16):** Purified on SiO<sub>2</sub> (10% diethyl ether/hexanes, stain in CAM) to afford a colorless oil. <sup>1</sup>H NMR (500 MHz, CDCl<sub>3</sub>) δ 7.64 (bd, J = 6.6 Hz, 6H); 7.46-7.37 (m, 9H); 5.21-5.18 (m, 1H); 4.93 (d, J = 9.0 Hz, 1H); 2.60 (dq, J = 18.4, 7.4 Hz, 1H); 2.44 (dq, J = 18.3, 7.3 Hz, 1H); 1.64 (d, J = 1.2, 3H); 1.41 (d, J = 1.2 Hz, 3H); 0.96 (t, J = 7.4 Hz, 3H); <sup>13</sup>C NMR (125 MHz, CDCl<sub>3</sub>) δ 210.5, 138.3, 135.4, 134.0, 130.0, 127.8, 122.5, 77.2, 30.8, 25.7,

18.4, 7.3; IR (neat) 2974, 2917, 1731, 1618, 1428, 1156, 1115, 710, 698, 506; HRMS (ESI+) for  $C_{26}H_{28}O_2Si$  [M+H]: calculated: 401.1905, found: 401.1920.

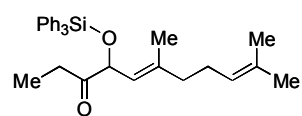

**(E)-6,10-dimethyl-4-(triphenylsilyloxy)undeca-5,9-dien-3-one (Compound S-17):** Purified on  $SiO_2$  (gradient 0-5% diethyl ether/hexanes, stain in CAM) to afford an inseparable 2:1 mixture of the *E:Z* isomers (see spectra) as a colorless oil.  $^1H$  NMR (500 MHz,  $C_6D_6$ )

$\delta$  7.81-7.73 (m, 6H); 7.20-7.14 (m, 9H); 5.36 (bd,  $J = 8.6$  Hz, 1H); 5.16 (d,  $J = 8.6$  Hz, 1H); 5.07-5.02 (m, 1H); 2.55 (dq,  $J = 18.1, 7.3$  Hz, 1H); 2.30 (dq,  $J = 18.1, 7.3$  Hz, 1H); 1.99-1.91 (m, 2H); 1.89-1.81 (m, 2H); 1.61 (s, 3H); 1.48 (s, 3H); 1.39 (s, 3H); 0.96 (t,  $J = 7.4$  Hz, 3H);  $^{13}C$  NMR (125 MHz,  $C_6D_6$ )  $\delta$  207.9, 141.0, 135.5, 134.3, 131.2, 130.0, 127.9, 124.0, 123.0, 77.6, 39.4, 30.4, 26.1, 25.4, 17.4, 16.6, 7.4; IR (neat) 2918, 1731, 1428, 1156, 834, 710, 506; LRMS (ESI+) for  $C_{31}H_{36}O_2Si$  [M+H]: calculated: 469.2, found: 469.2.

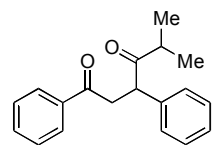

**5-methyl-1,3-diphenylhexane-1,4-dione (Compound S-18):** Purified on  $SiO_2$  (15% diethyl ether/hexanes, stain in CAM) to afford a colorless oil.  $^1H$  NMR (500 MHz,  $CDCl_3$ )  $\delta$  7.89-7.83 (m, 2H); 7.46 (tt,  $J = 6.8, 1.5$  Hz, 1H); 7.37-7.34 (m, 2H); 7.28-7.25 (m, 2H); 7.21-7.18 (m, 3H); 4.52 (dd,  $J = 10.2, 3.7$  Hz, 1H); 3.95 (dd,  $J = 18.1, 10.3$  Hz, 1H); 3.00 (dd,  $J = 18.0, 3.6$  Hz, 1H); 2.72 (sept,  $J = 7.1$  Hz, 1H); 1.16 (d,  $J = 7.0$  Hz, 3H); 0.84 (dd,  $J = 6.8$  Hz, 3H);  $^{13}C$  NMR (125 MHz,  $CDCl_3$ )  $\delta$  213.0, 198.1, 138.3, 136.5, 133.1, 129.0, 128.5, 128.3, 128.0, 127.4, 51.8, 42.5, 39.8, 19.2, 18.3; IR (neat) 2966, 2901, 1711, 1685, 1598, 1493, 1449, 1239, 1017, 753, 699; LRMS (ESI+) for  $C_{19}H_{20}O_2$  [M+H]: calculated: 281.3, found: 281.2.

Sample: dwc1-chalcone  
File: exp  
Pulse Sequence: s2pu1  
Solvent: cdcl3  
Temp: 25.0 C / 298.1 K  
Operator: jpm  
VMRS-400 "nmr14"  
Relax. delay 1.000 sec  
Pulse 45.0 degrees  
Acq. time 2.049 sec  
Width 6410.3 Hz  
16 repetitions  
OBSERVE H1 399.7662768 MHz  
DATA PROCESSING  
Resol: enhancement -0.0 Hz  
FT size 65536  
Total time 0 min, 55 sec

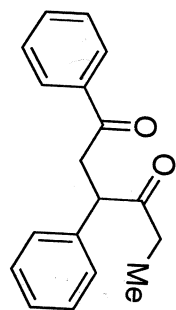

Compound S-1

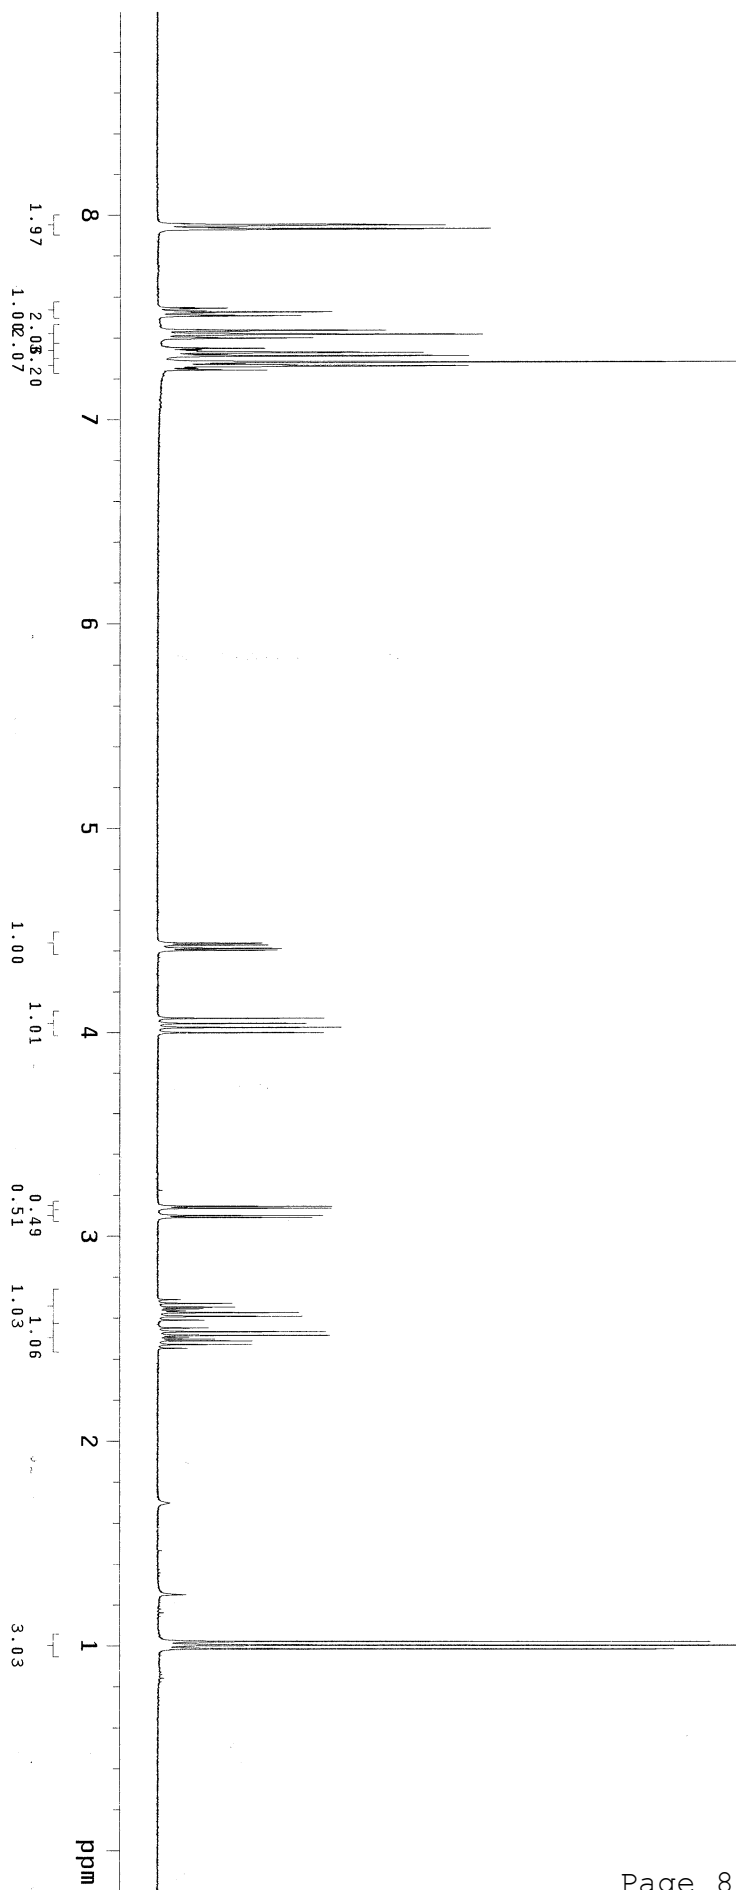



dwc1-296-1c

Solvent: CDCl3  
Temp. 25.0 C / 298.1 K  
INOVA-400 "nmr10"

Relax. delay 1.000 sec  
Pulse 60.0 degrees  
Acq. time 2.000 sec  
Width 50000.0 Hz  
320 Repetitions  
OBSERVE C13, 100.5212863 MHz  
DECUPLE H1, 399.7682759 MHz  
POWER 40 dB  
continuously on  
WALTZ-16 modulated  
DATA PROCESSING  
Line broadening 2.0 Hz  
FT size 262144  
Total time 50 min, 8 sec

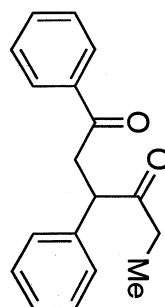

Compound S-1

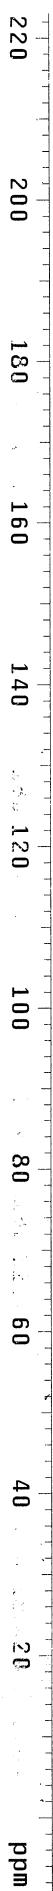

Sample: dwc1-258-pureH  
File: exp

Pulse Sequence: s2pul1

Solvent: cdcl3

Temp: 25.0 C / 298.1 K

Operator: morken

VMRS-500 "nmr15"

Relax. delay 1.000 sec

Pulse 45.0 degrees

Acq. time 2.049 sec

Width 8012.8 Hz

8 repetitions

OBSERVE H1 499.8853621 MHz

DATA PROCESSING

Resol. enhancement -0.0 Hz

FT size 65536

Total time 0 min, 30 sec

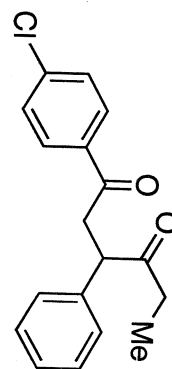

Compound S-2

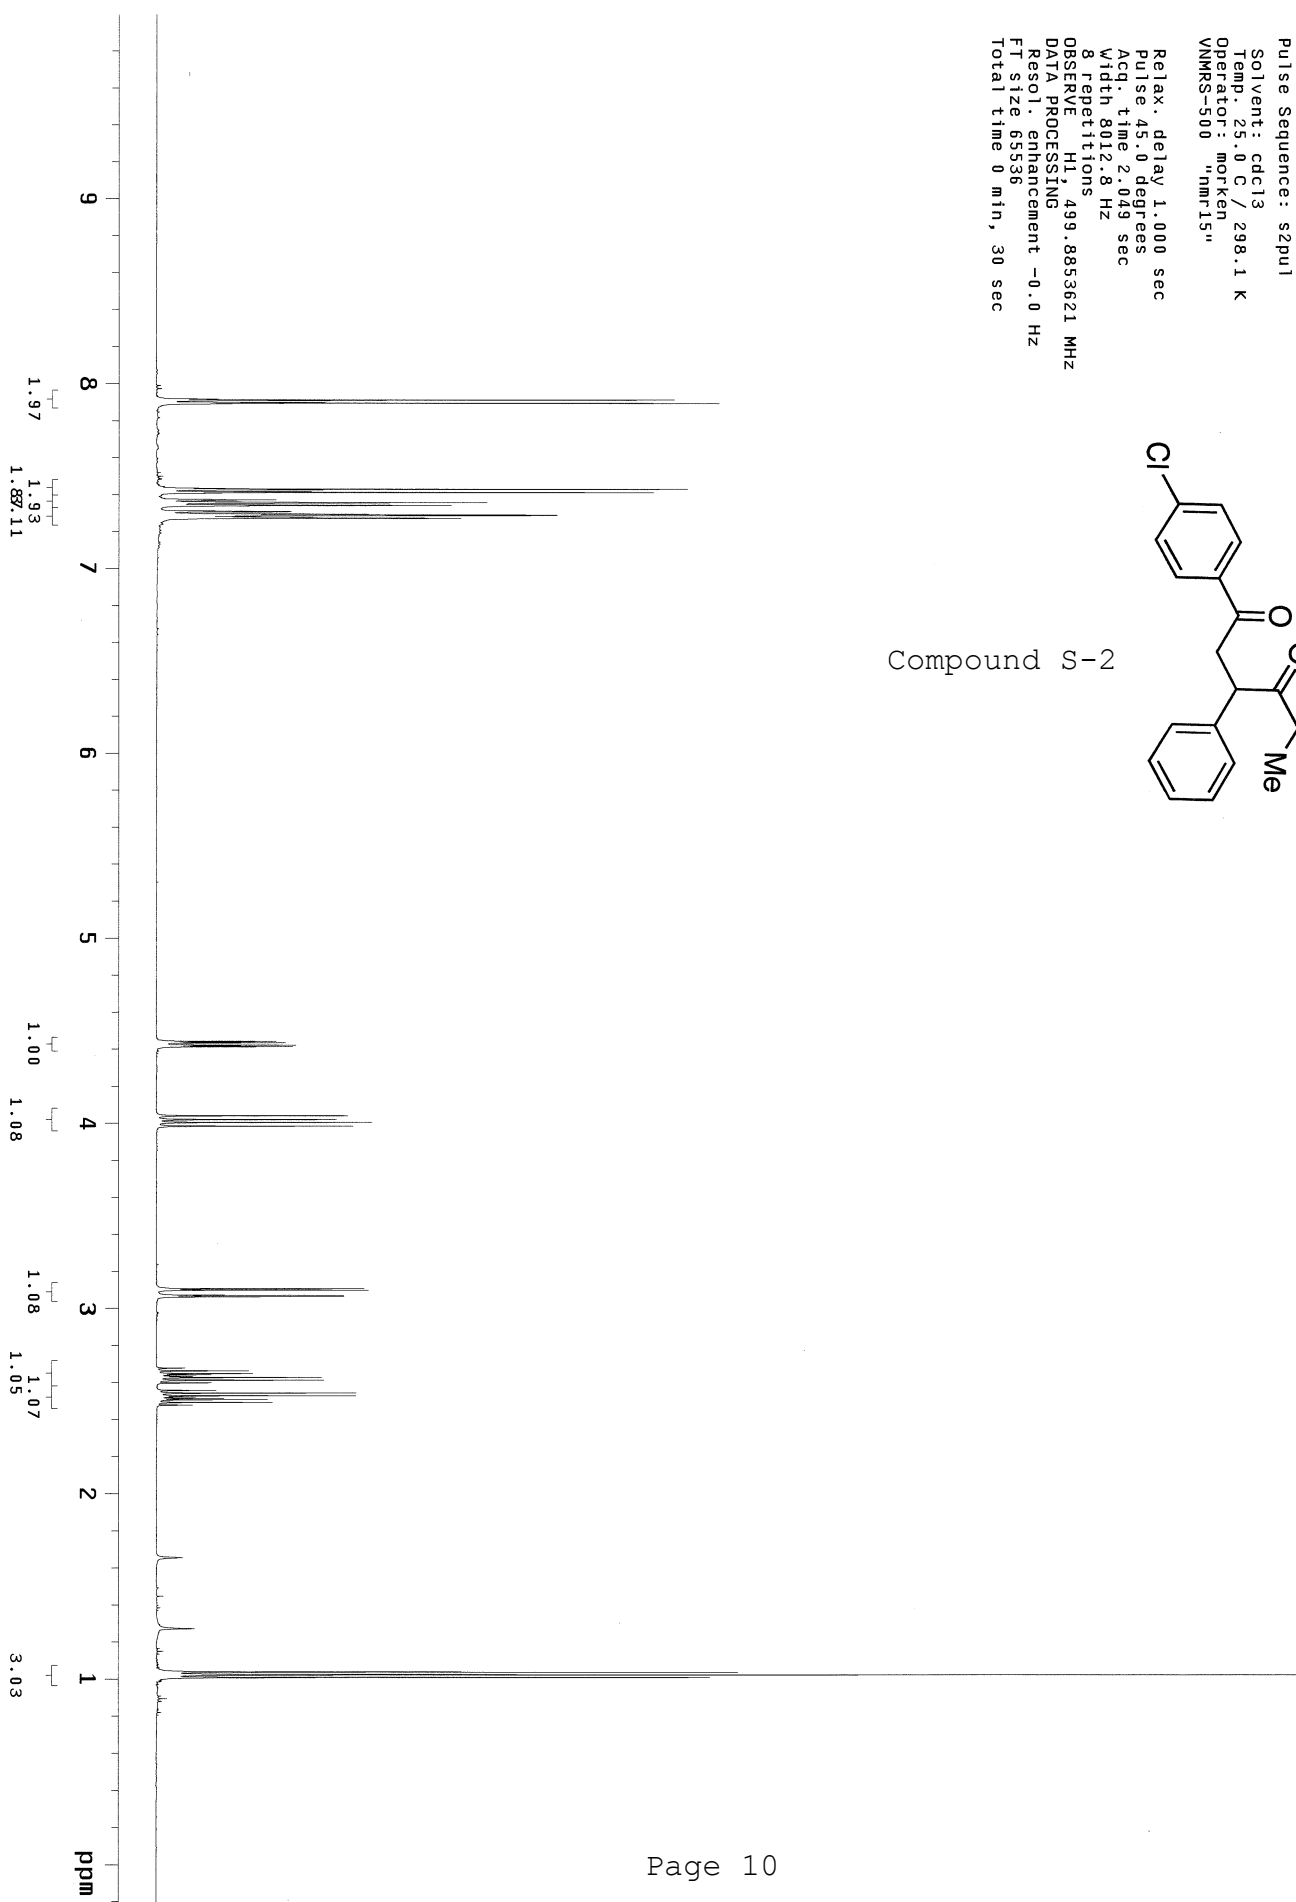

Sample: dwt1-258-purec  
File: exp  
Pulse Sequence: s2pu1  
Solvent: cdcl3  
Temp: 25.0 C / 298.1 K  
Operator: morKen  
VMRS-500 "hmr15"

Relax. delay 1.000 sec  
Pulse 45.0 degrees  
Acq. time 1.300 sec  
Width 33783.8 Hz  
104 repetitions  
OBSERVE C13, 125.6962743 MHz  
DECUPLE H1, 499.8878615 MHz  
Power 40 dB  
continuously on  
WALTZ-16 modulated  
DATA PROCESSING  
Line broadening 0.5 Hz  
FT size 131072  
Total time 6 hr, 23 min, 26 sec

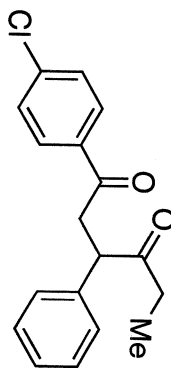

Compound S-2

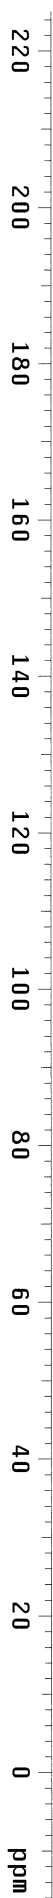

Sample: dwc1-260-pureH  
File: exp

Pulse Sequence: szpu1

Solvent: cdcl3  
Temp: 25.0 C / 298.1 K  
Operator: morken  
VMRS-500 "nmr15"

Relax. delay 1.000 sec  
Pulse 45.0 degrees

Acq. time 2.049 sec  
Width 8012.8 Hz

8 repetitions

OBSERVE HI 499.8853621 MHZ  
DATA PROCESSING  
Resol. enhancement -0.0 Hz

FT size 65536  
Total time 0 min, 30 sec

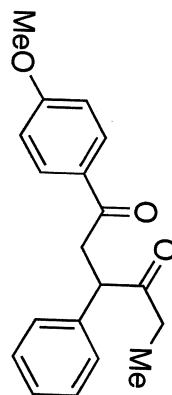

Compound S-3

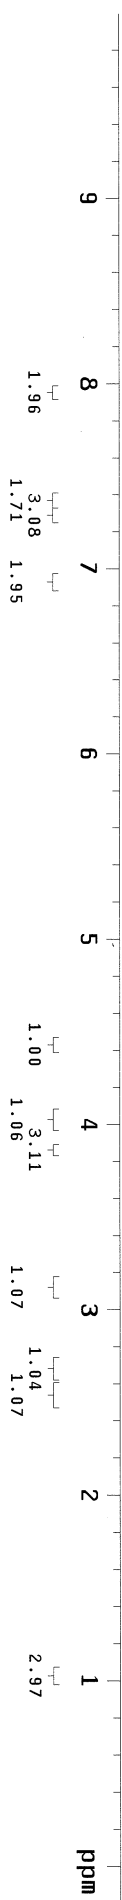

Sample: dwd1-260-purec  
File: exp

Pulse Sequence: s2pul1

Solvent: cdcl3  
Temp: 25.0 C / 298.1 K  
Operator: morken  
VMRS-500 "nmr15"

Relax. delay 1.000 sec  
Pulse 45.0 degrees

Acq. time 1.300 sec

Width 33783.8 Hz

24 repetitions

OBSERVE C13, 125.6962743 MHz

DECUPLE H1, 499.8878615 MHz

Power 40 db

continuously on

WALTZ-16 modulated

DATA PROCESSING

Line broadening 0.5 Hz

FT size 131072

Total time 38 min, 21 sec

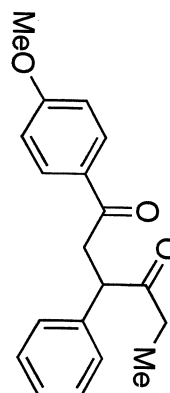

Compound S-3

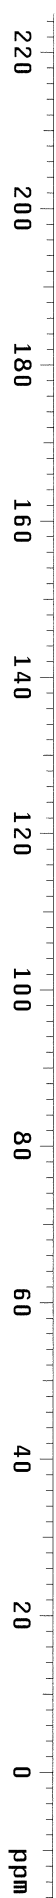

Sample: dwc1-4Cl-chalcone  
File: exp  
Pulse Sequence: szpul  
Solvent: cdcl3  
Temp: 25.0 C / 298.1 K  
Operator: jpm  
VMRS-400 "hmr14"  
Relax. delay 1.000 sec  
Pulse 45.0 degrees  
Acq. time 2.049 sec  
Width 6410.3 Hz  
8 repetitions  
OBSERVE H1, 399.7662768 MHz  
DATA PROCESSING  
Resol. enhancement -0.0 Hz  
FT size 65536  
Total time 0 min, 30 sec

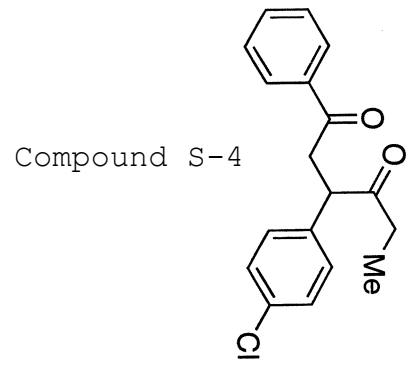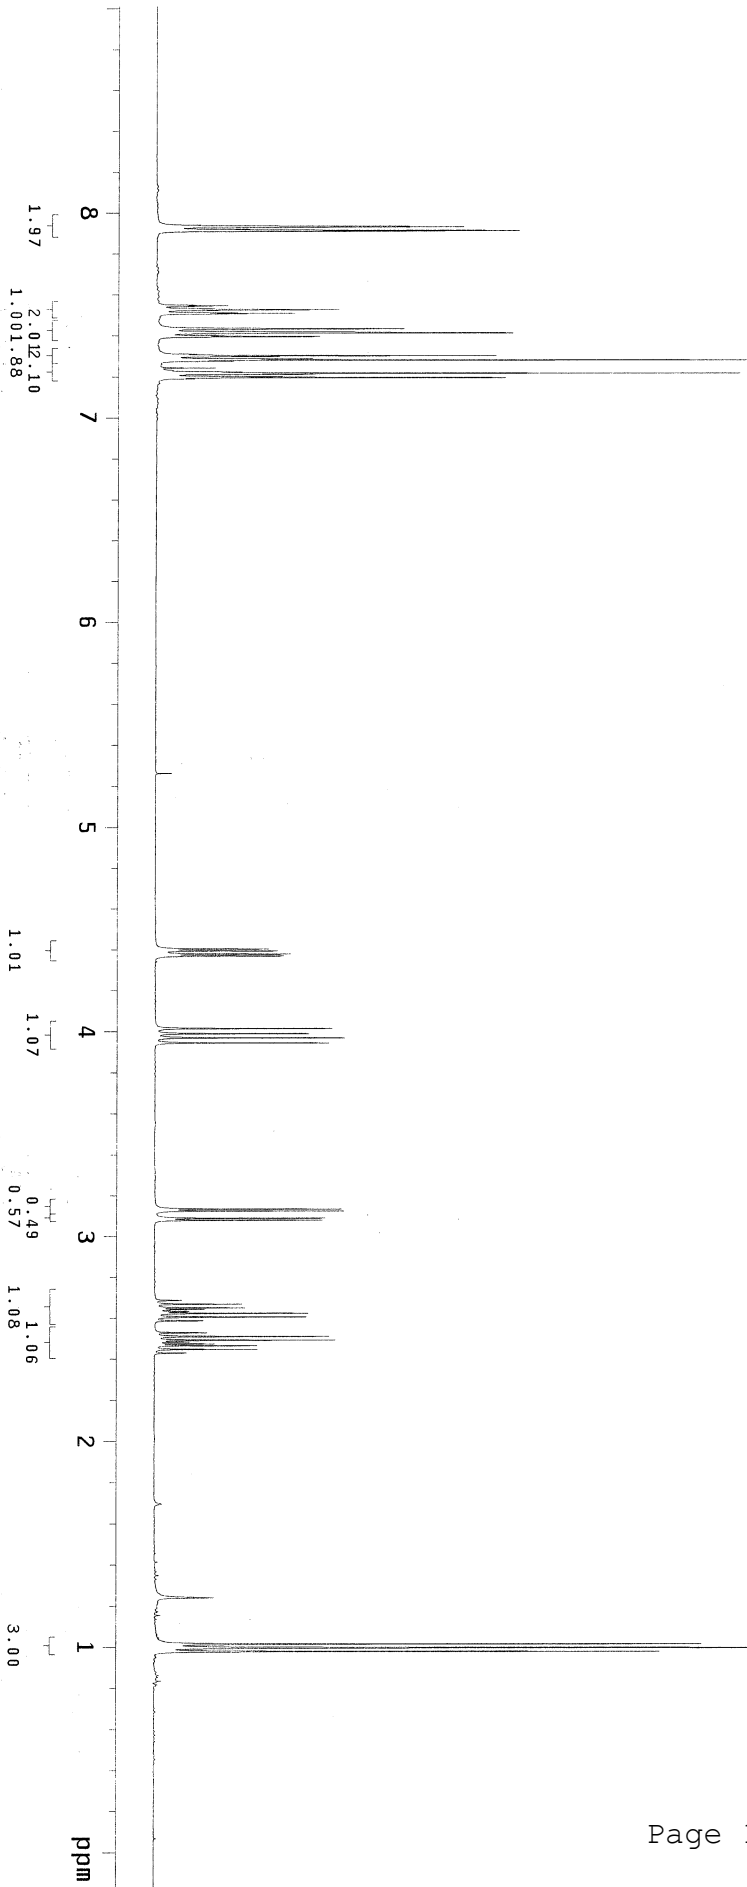

Sample: dwc1-4Cl-chalconec  
File: exp

Pulse Sequence: s2pul  
Solvent: cdcl3  
Temp: 25.0 C / 298.1 K  
Operator: jpm  
VNMRS-400 "nmr14"

Relax . delay 1.000 sec  
Pulse 45.0 degrees  
Acq. time 1.301 sec  
Width 27173.9 Hz  
40 repetitions  
OBSERVE C13, 100.5213103 MHz  
DECUPLE H1, 399.7682756 MHz  
Power 40 db  
continously on  
WALTZ-16 modulated  
DATA PROCESSING  
Line broadening 0.5 Hz  
Ft size 131072  
Total time 38 min, 21 sec

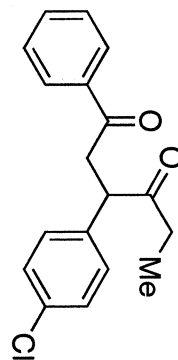

Compound S-4

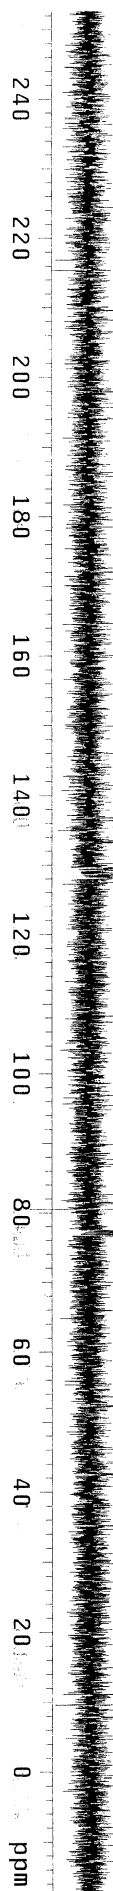

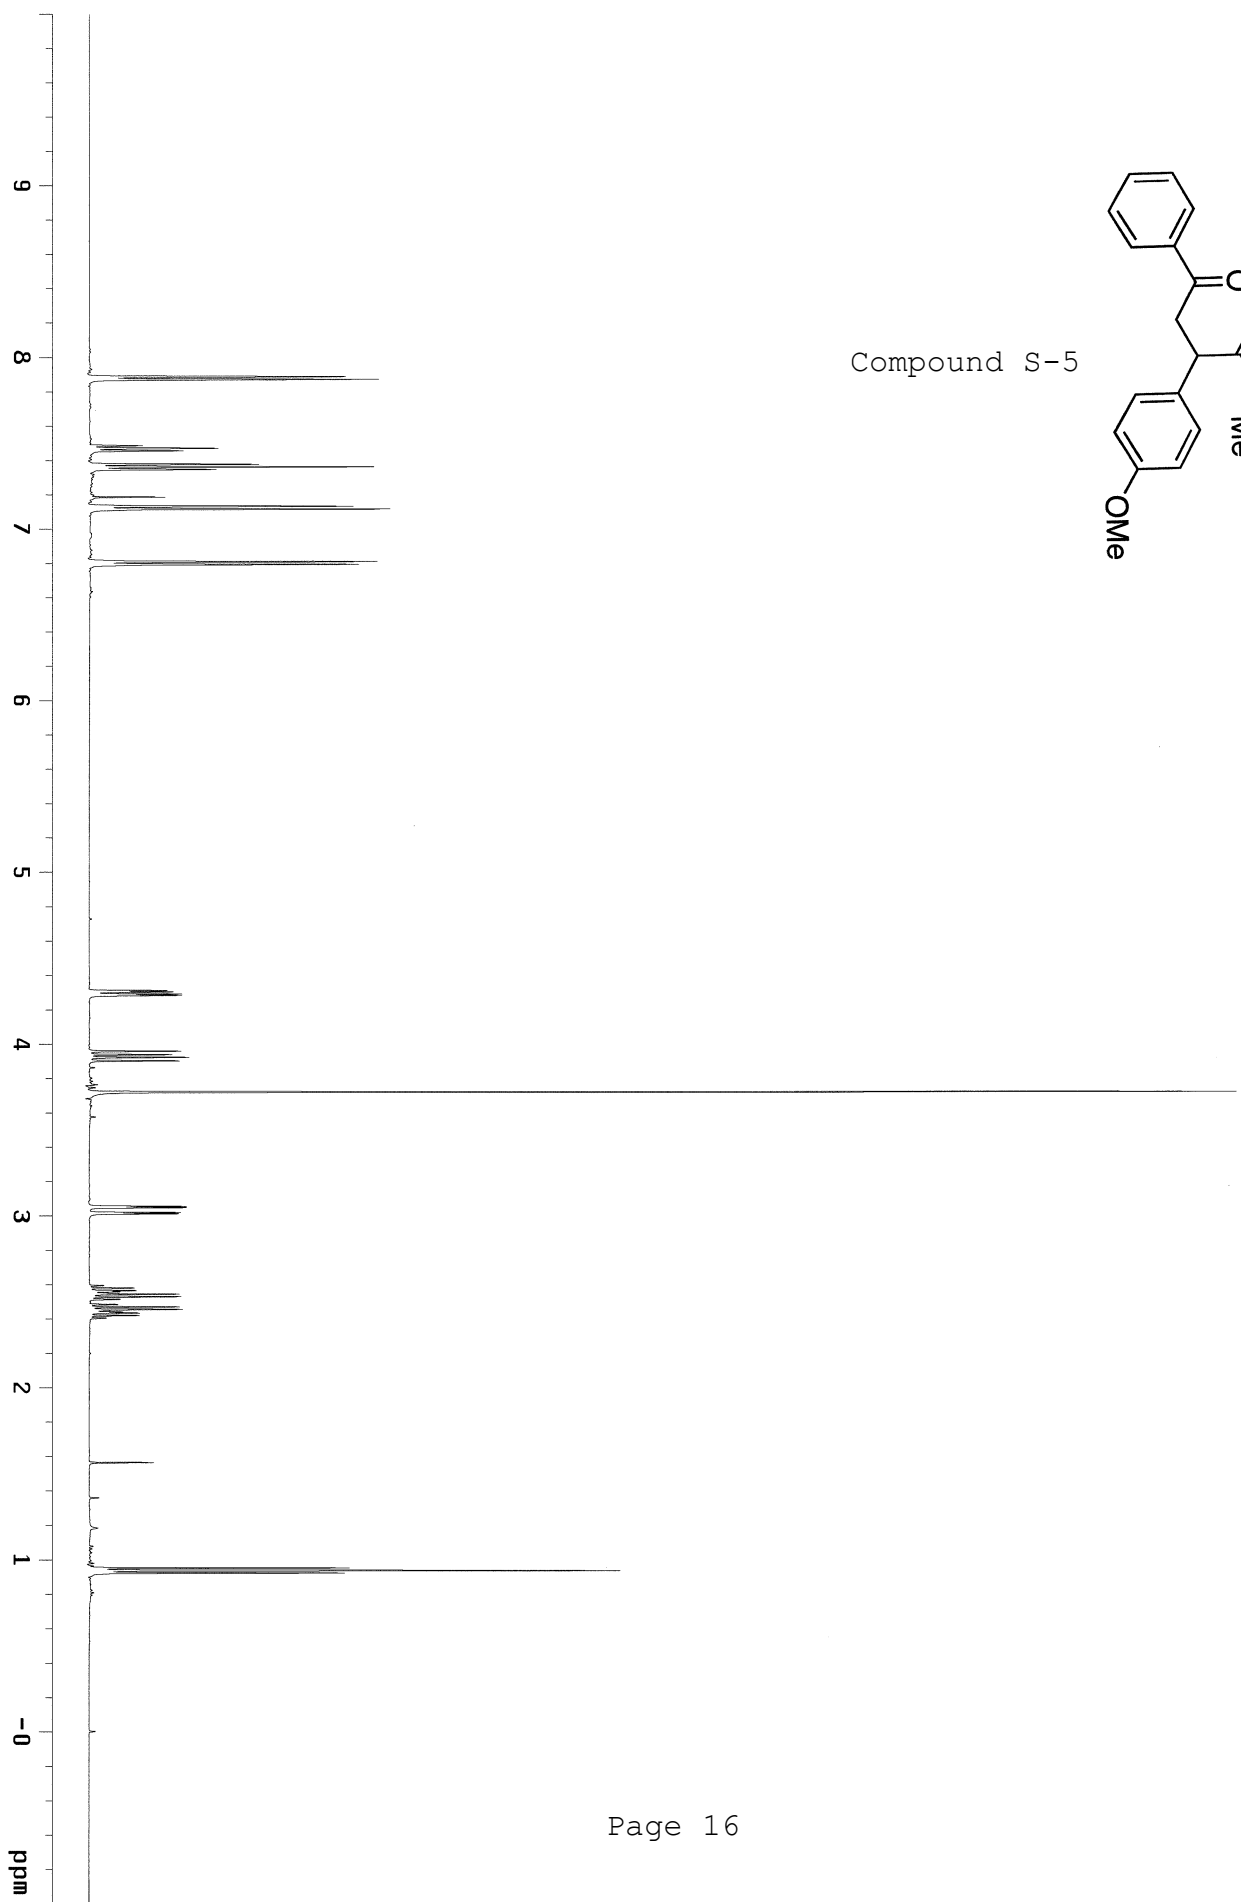

Compound S-5

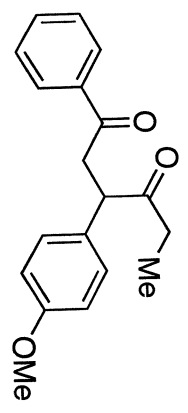



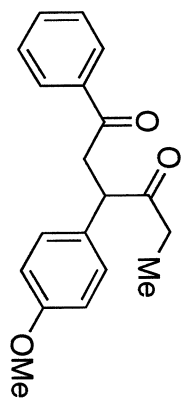

Compound S-5

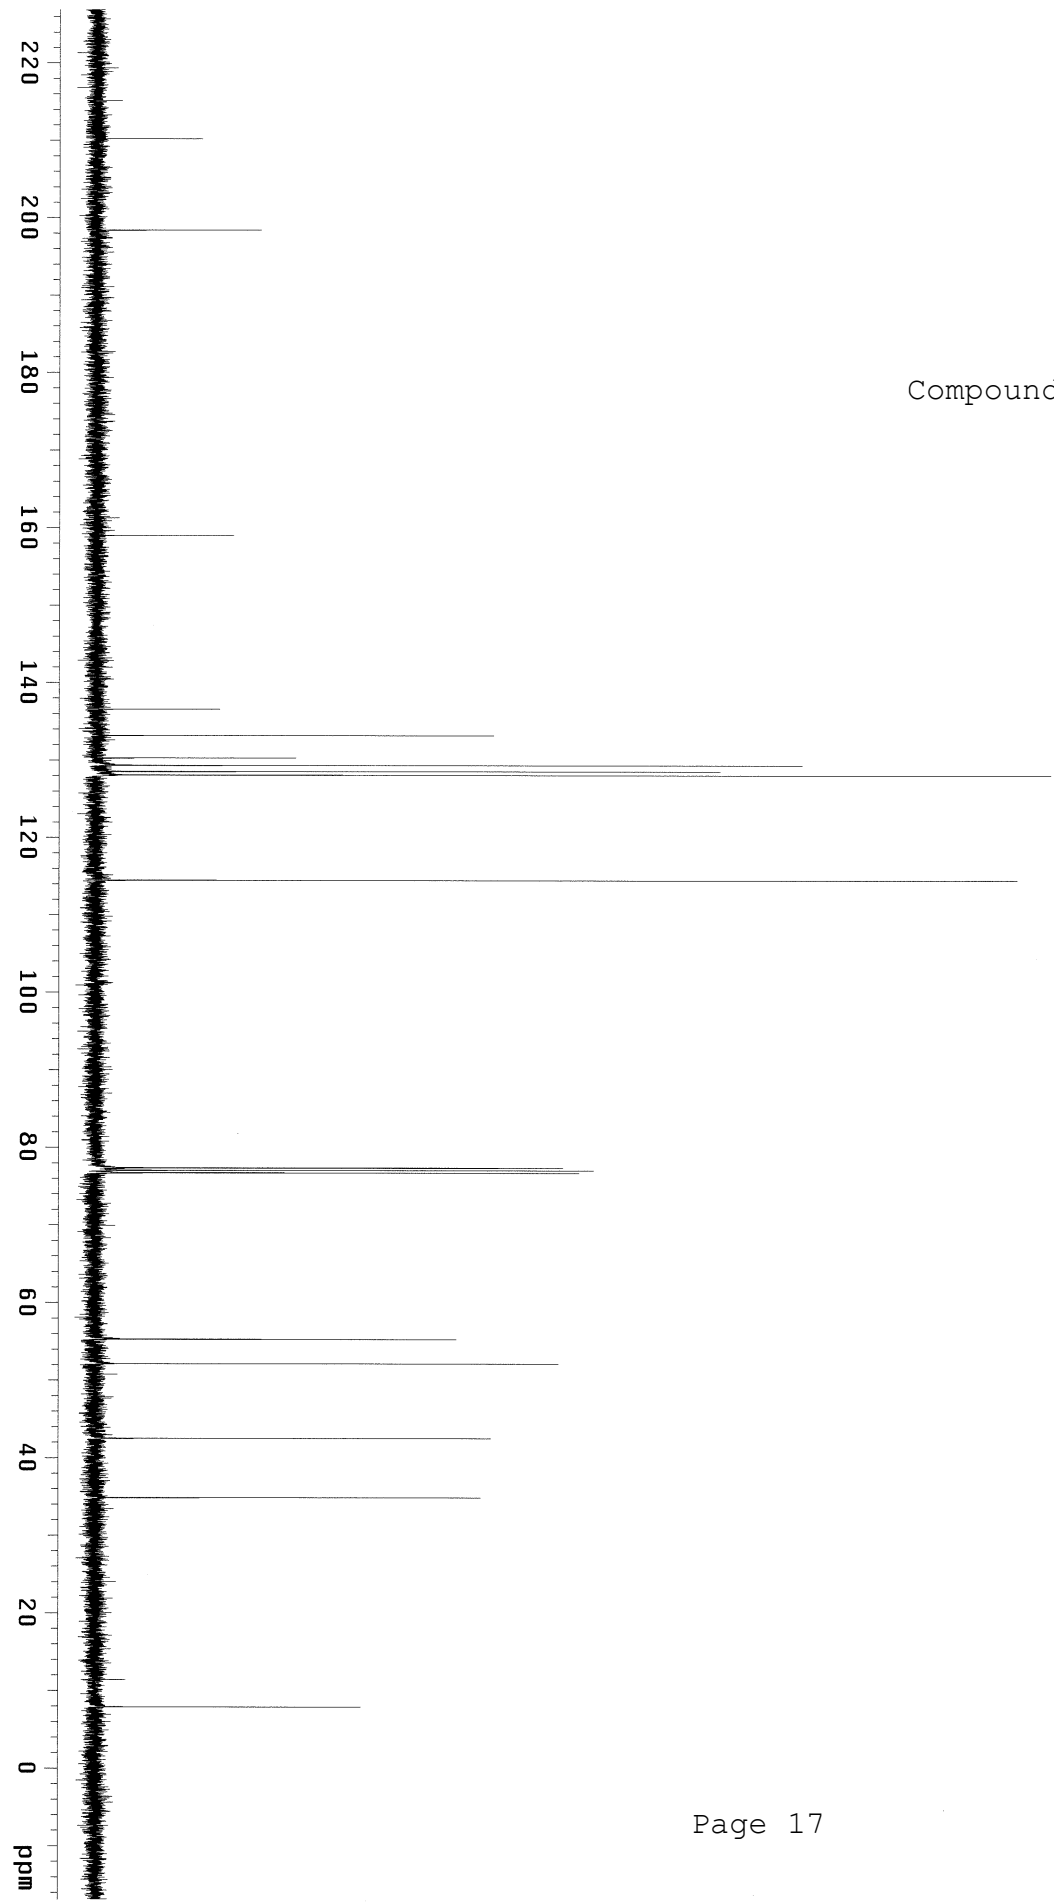

Sample: dwc1-ester-chalcone  
File: exp  
Pulse Sequence: szpu1  
Solvent: cdcl3  
Temp: 25.0 C / 298.1 K  
Operator: jpm  
VMRS-400 "nmr14"  
Relax. delay 1.000 sec  
Pulse 45.0 degrees  
Acq. time 2.049 sec  
Width 6410.3 Hz  
8 repetitions  
OBSERVE H1, 399.7662768 MHz  
DATA PROCESSING  
Resol. enhancement -0.0 Hz  
FT size 65536  
Total time 0 min, 30 sec

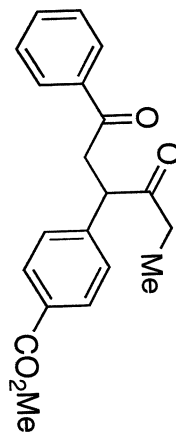

Compound S-6

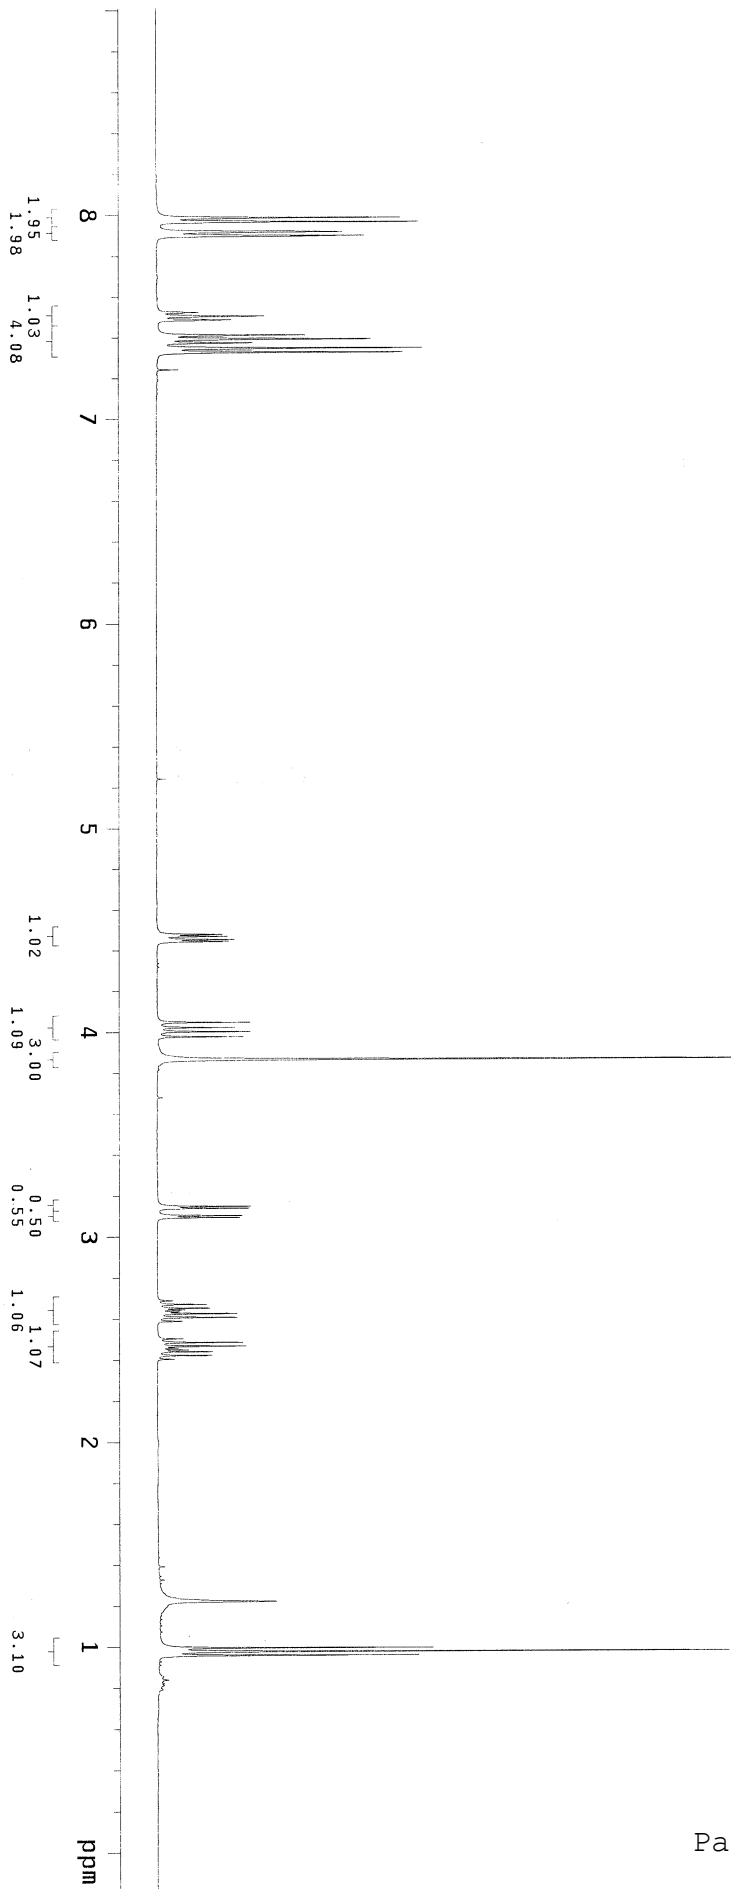

Sample: dwc1-ester-cha  
 File: exp  
 Pulse Sequence: szpu1  
 Solvent: cdcl3  
 Temp: 25.0 C / 298.1  
 Operator: jpm  
 VNMR-400 "nmr14"

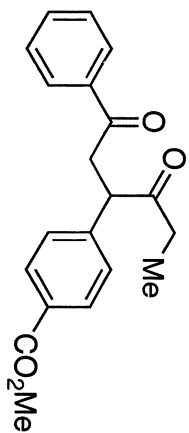

Relax. delay 1.000 sec  
 Pulse 45.0 degrees  
 Acq. time 1.300 sec  
 Width 24509.8 Hz  
 48 repetitions  
 OBSERVE C13, 100.5213103 MHz  
 DECOUPLE H1, 399.7682756 MHz  
 Power 40 dB  
 continuously on  
 WALTZ-16 modulated  
 DATA PROCESSING  
 Line broadening 0.5 Hz  
 FT size 65536  
 Total time 38 min, 21 sec

Compound 5-6

| INDEX | FREQUENCY | PPM     | HEIGHT |
|-------|-----------|---------|--------|
| 1     | 21028.0   | 209.189 | 29.6   |
| 2     | 19874.6   | 197.715 | 47.5   |
| 3     | 16745.8   | 166.589 | 33.1   |
| 4     | 14414.3   | 143.396 | 34.6   |
| 5     | 13698.5   | 136.275 | 29.5   |
| 6     | 13400.1   | 133.306 | 61.4   |
| 7     | 13098.6   | 130.307 | 141.3  |
| 8     | 13011.9   | 129.444 | 33.6   |
| 9     | 12923.6   | 128.566 | 159.8  |
| 10    | 12898.9   | 128.320 | 137.5  |
| 11    | 12870.5   | 128.037 | 110.7  |
| 12    | 7780.5    | 77.401  | 49.1   |
| 13    | 7748.3    | 77.081  | 49.6   |
| 14    | 7716.2    | 76.761  | 45.9   |
| 15    | 5320.4    | 52.928  | 71.4   |
| 16    | 5238.1    | 52.109  | 53.5   |
| 17    | 4247.0    | 42.250  | 68.3   |
| 18    | 3544.7    | 35.263  | 59.4   |
| 19    | 2980.7    | 29.652  | 11.1   |
| 20    | 780.9     | 7.768   | 57.0   |

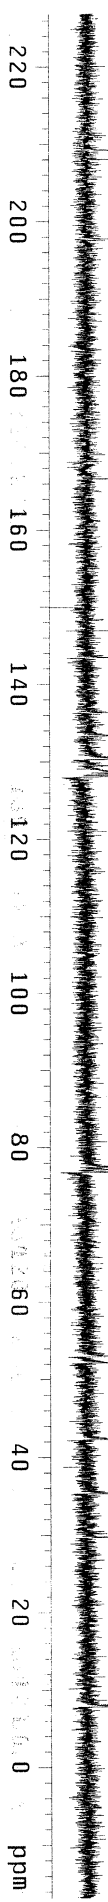

HTL-1-129-p-HNMR

exp3 std1h

SAMPLE  
 date Jul 14 2009  
 solvent CDC13  
 file /export/home/~  
 jpm/HTL-1-129-p-HN~  
 MR.fid  
 ACQUISITION  
 sfrq 399.768  
 tm HI  
 at 3.744  
 np 44932  
 sw 6000.6  
 fb 3000  
 bs 4  
 tpwr 57  
 pw 7.0  
 dl 1.256  
 tof 0  
 nt 8  
 ct 8  
 wexp 8  
 atock n  
 gain not used

DEC. & VT 399.768  
 dn HI  
 dpvr 30  
 dof 0  
 dm nnn  
 dmm c  
 dmf 200  
 dseq 1.0  
 dres n  
 homo  
 wtrfile  
 proc ft  
 fn not used  
 math f

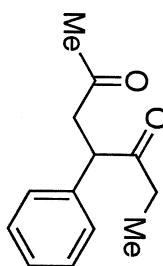

Compound S-7

DISPLAY  
 sp -399.8  
 wd 4397.4  
 vs 39  
 sc 0  
 wc 250  
 hzmm 17.59  
 fs 72.13  
 rffl 1001.2  
 rfp 0  
 th 50  
 ins 100.000  
 al cdc ph

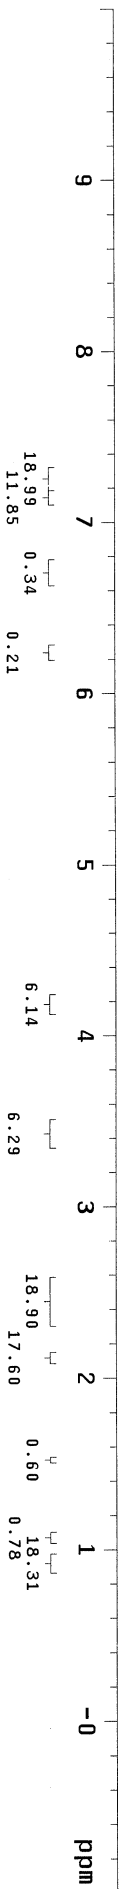

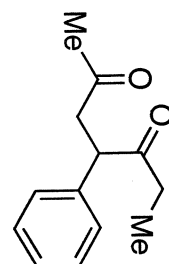

Compound S-7

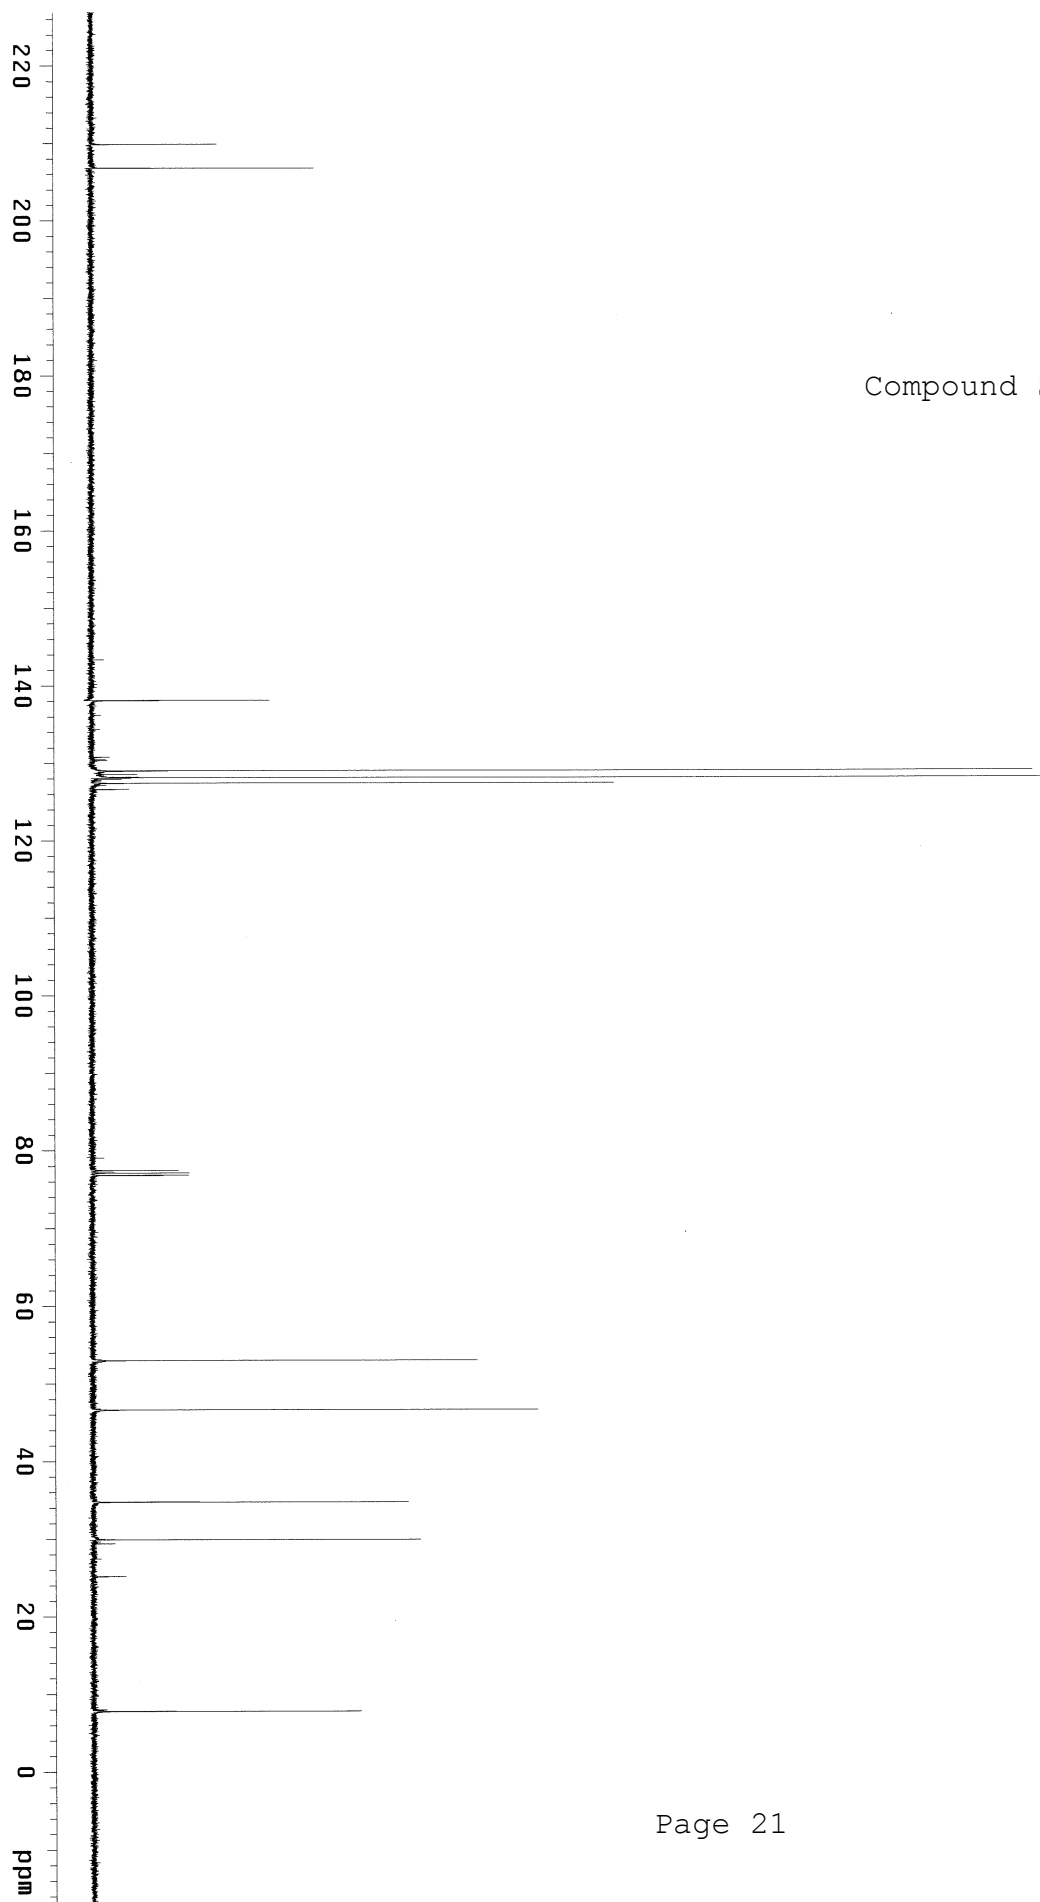

Pulse Sequence: s2pu1  
Solvent: CDCl3  
Ambient temperature  
INDVA-500 "hmf9"  
Relax. delay 1.000 sec  
Pulse 90.2 degrees  
Acq. time 2.000 sec  
Width 8000.0 Hz  
8 repetitions  
OBSERVE H1, 499.7720124 MHz  
DATA PROCESSING  
FT size 32768  
Total time 0 min, 24 sec

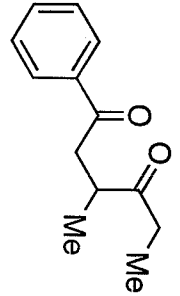

\* inseparable unknown

Compound S-8

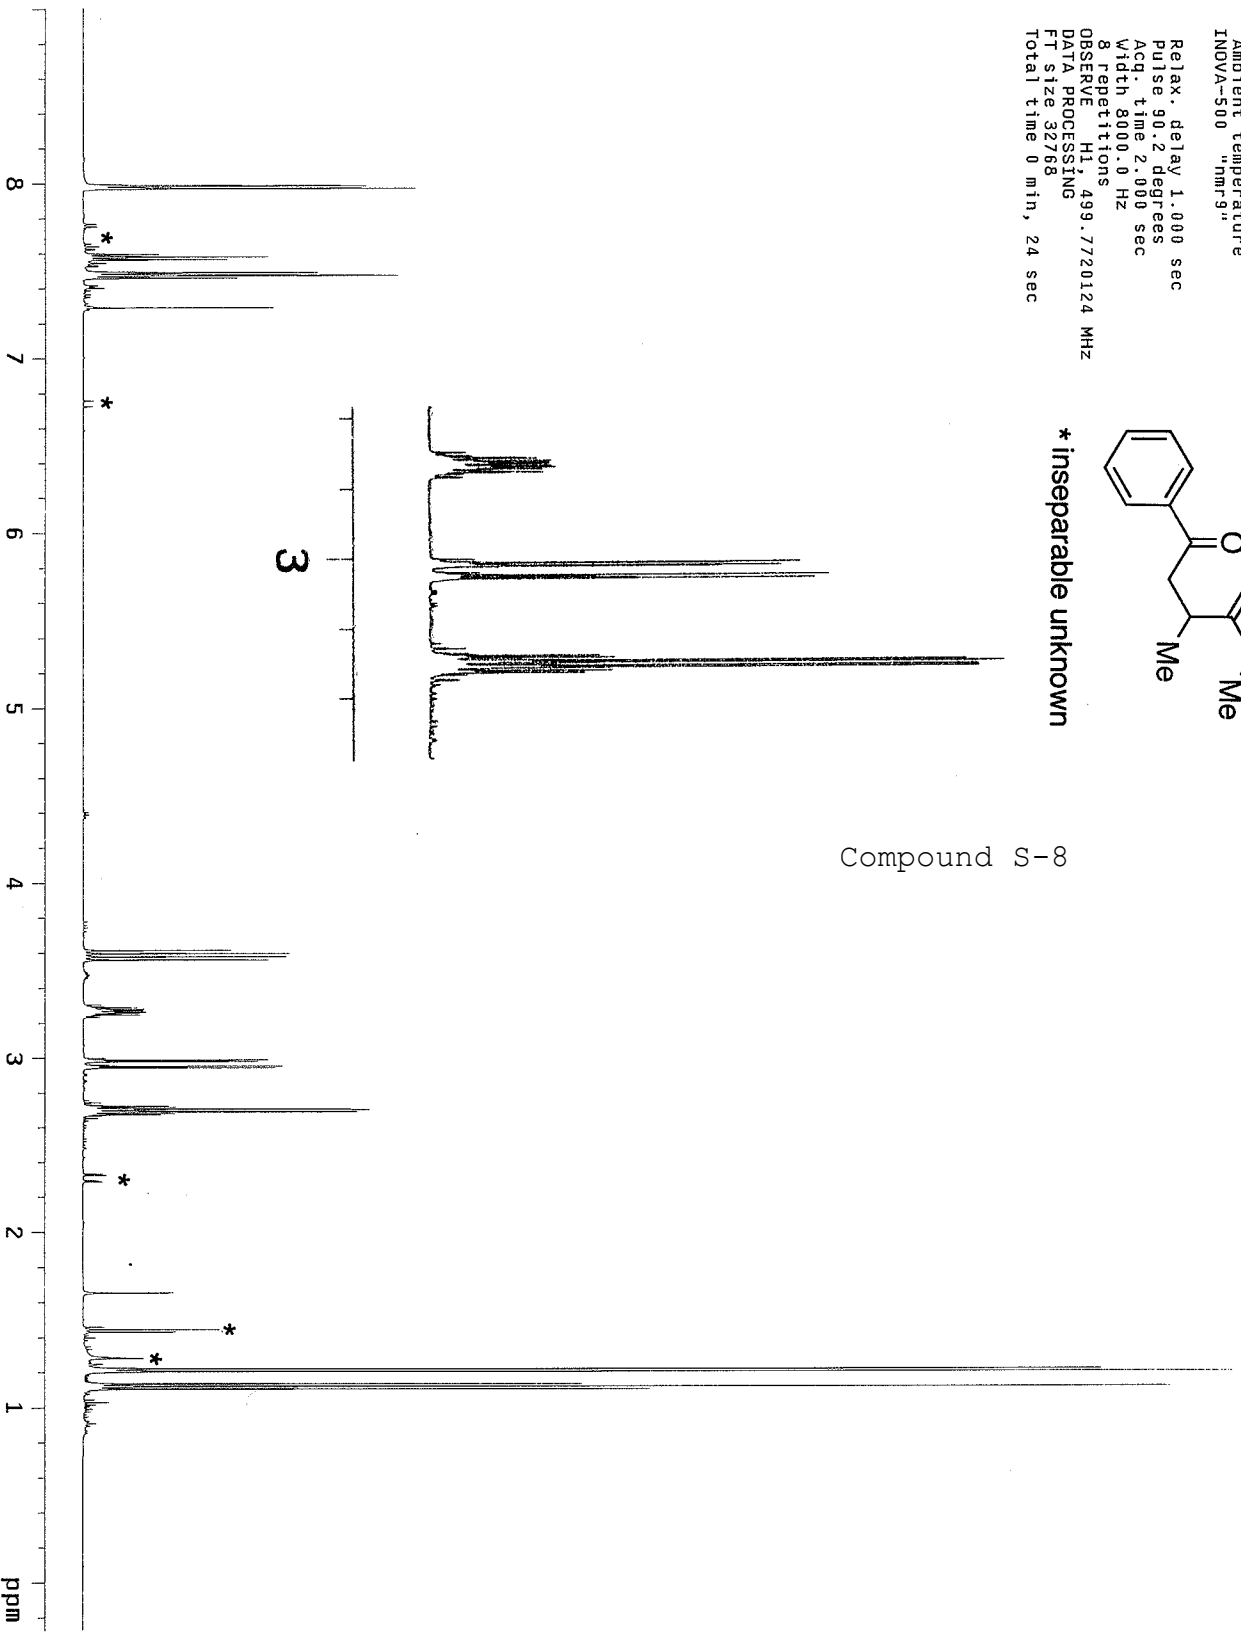

Solvent: CDCl3  
Temp. 25.0 C / 298.1 K  
INOVA-400 "nmr10"  
Relax. delay 1.000 sec  
Pulse 60.0 degrees  
Acq. time 2.000 sec  
Width 50000.0 Hz  
160 repetitions  
OBSERVE C13, 100.5212863 MHz  
DECUPLE H1, 399.7882759 MHz  
Power 40 dB  
continuously on  
WALTZ-16 modulated  
DATA PROCESSING  
Line broadening 2.0 Hz  
Ft size 262144  
Total time 50 min, 8 sec

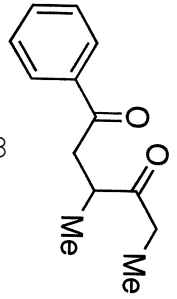

Compound S-8

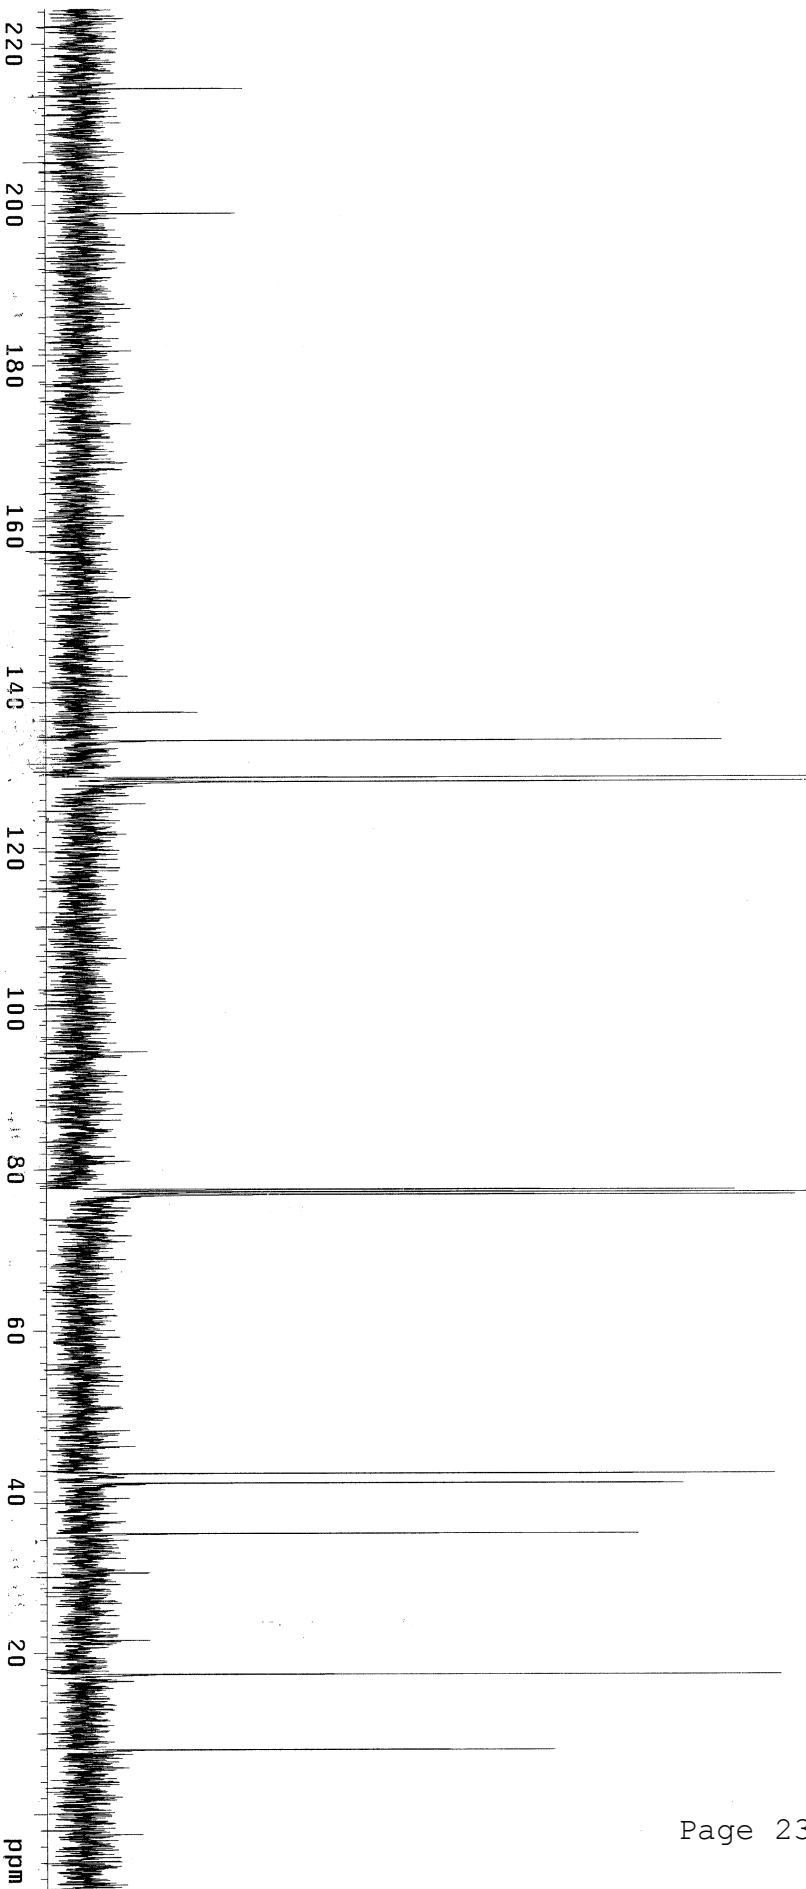

Sample: dwc2-alkyl-alkyl  
File: /home/vnmr1/vnmr/sys/data/Custar/dwc2-alkyl-alkyl.fid  
Pulse Sequence: s2pu1  
Solvent: cdcl3  
Temp: 26.0 C / 299.1 K  
Operator: vnmr1  
File: dwc2-alkyl-alkyl  
VNMR-400 "nmr14"  
Relax. delay 1.000 sec  
Pulse 45.0 degrees  
Acq. time 2.049 sec  
Width 6410.3 Hz  
8 repetitions  
OBSERVE H1, 399.7663191 MHz  
DATA PROCESSING  
Resol: enhancement -0.0 Hz  
FT size 65536  
Total time 0 min, 30 sec

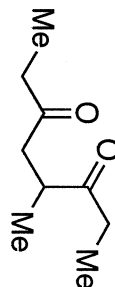

Compound S-9

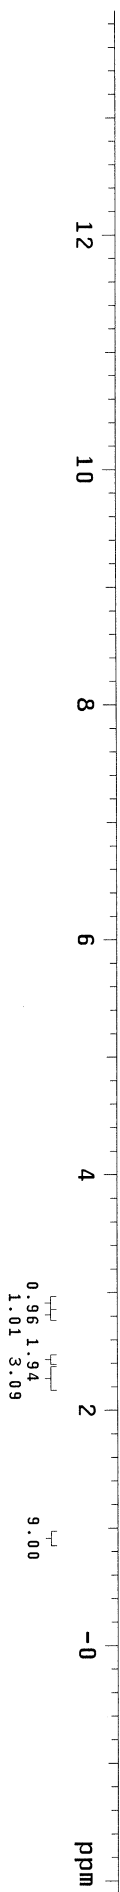



Sample: dwc2-alkyl-alkyl\_C  
File: exp  
Pulse Sequence: szpu1  
Solvent: cdcl3  
Temp: 26.0 C / 299.1 K  
Operator: vnmr1  
VNMR-400 "nmr14"

Relax. delay 1.000 sec  
Pulse 45.0 degrees  
Acq. time 1.300 sec  
Width 24509.8 Hz  
80 repetitions  
OBSERVE C13, 100.5213103 MHz  
DECOUPLE H1, 399.7682756 MHz  
Power 40 dB  
continuously on  
WALTZ-16 modulated  
DATA PROCESSING  
Line broadening 0.5 Hz  
FT size 65536  
Total time 38 min, 21 sec

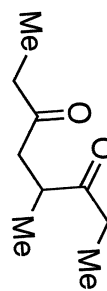

Compound S-9

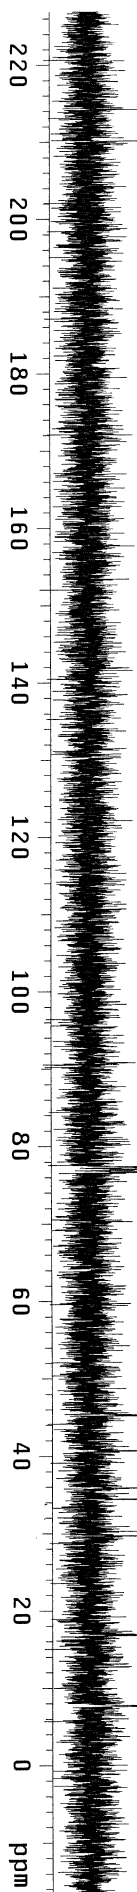

dwcl-291-1

Pulse Sequence: s2pul1

Solvent: CDCl3

Ambient temperature

INOVA-500 "nmr9"

Relax. delay 1.000 sec

Pulse 90.2 degrees

Acq. time 2.000 sec

Width 8000.0 Hz

8 repetitions

OBSERVE H1, 499.7720124 MHz

DATA PROCESSING

FT size 32788

Total time 0 min, 24 sec

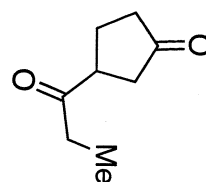

Compound S-10

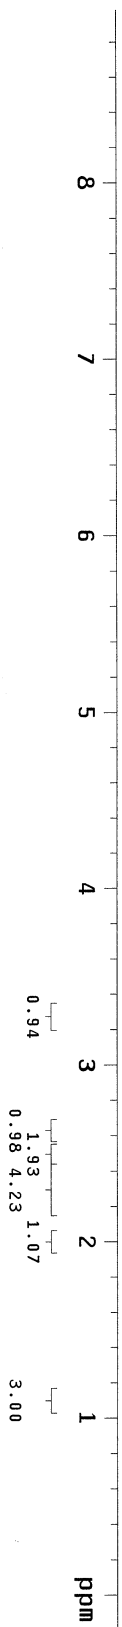

dwci-291-1-C

Solvent: CDCl3  
Temp. 25.0 C / 298.1 K  
INOVA-400 "nmr10"

Relax. delay 1.000 sec  
Pulse 60.0 degrees  
Acq. time 2.000 sec  
Width 50000.0 Hz  
184 repetitions  
OBSERVE C13, 100.5212863 MHz  
DECUPLE H1, 399.7682759 MHz  
Power 40 dB  
continuously on  
WALTZ-16 modulated  
DATA PROCESSING  
Line broadening 2.0 Hz  
FT size 262144  
Total time 50 min, 8 sec

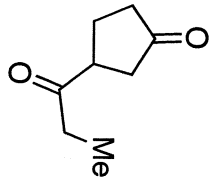

Compound S-10

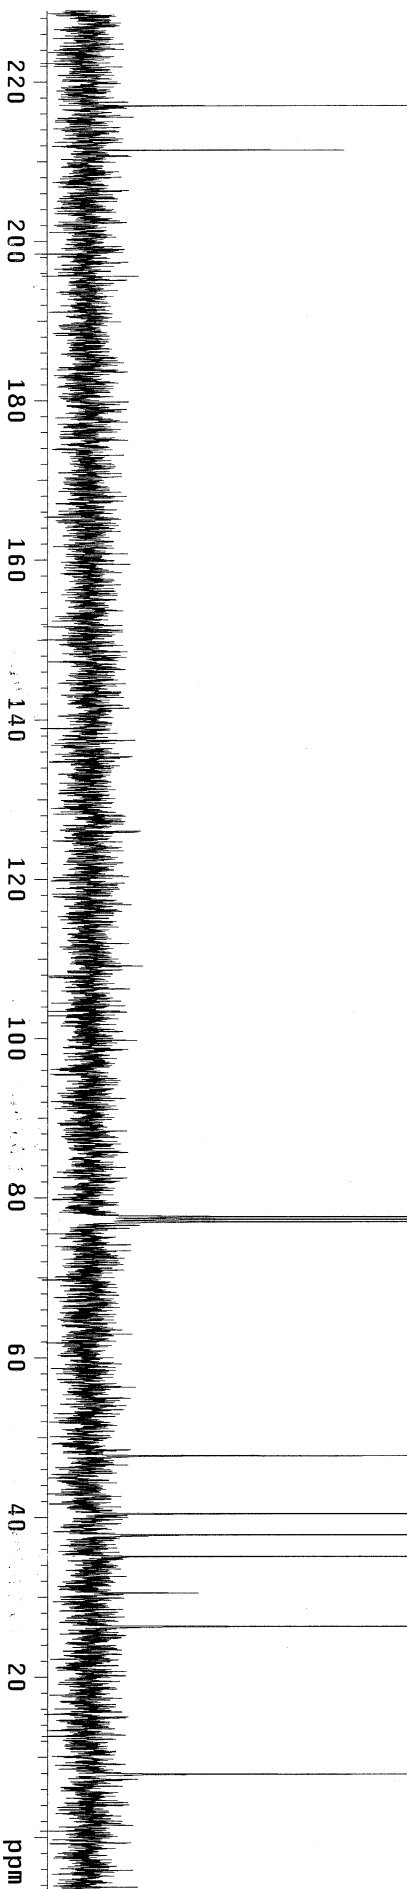

dwcl-cyclohexenone\_1H  
Pulse Sequence: s2pu1  
Solvent: CDCl3  
Ambient temperature  
INOVA-500 "nmr9"  
Relax. delay 1.000 sec  
Pulse 65.9 degrees  
Acq. time 2.000 sec  
Width 8000.0 Hz  
8 repetitions  
OBSERVE H1, 499.7720124 MHz  
DATA PROCESSING  
FT size 32768  
Total time 0 min, 24 sec

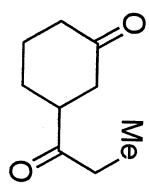

Compound S-11

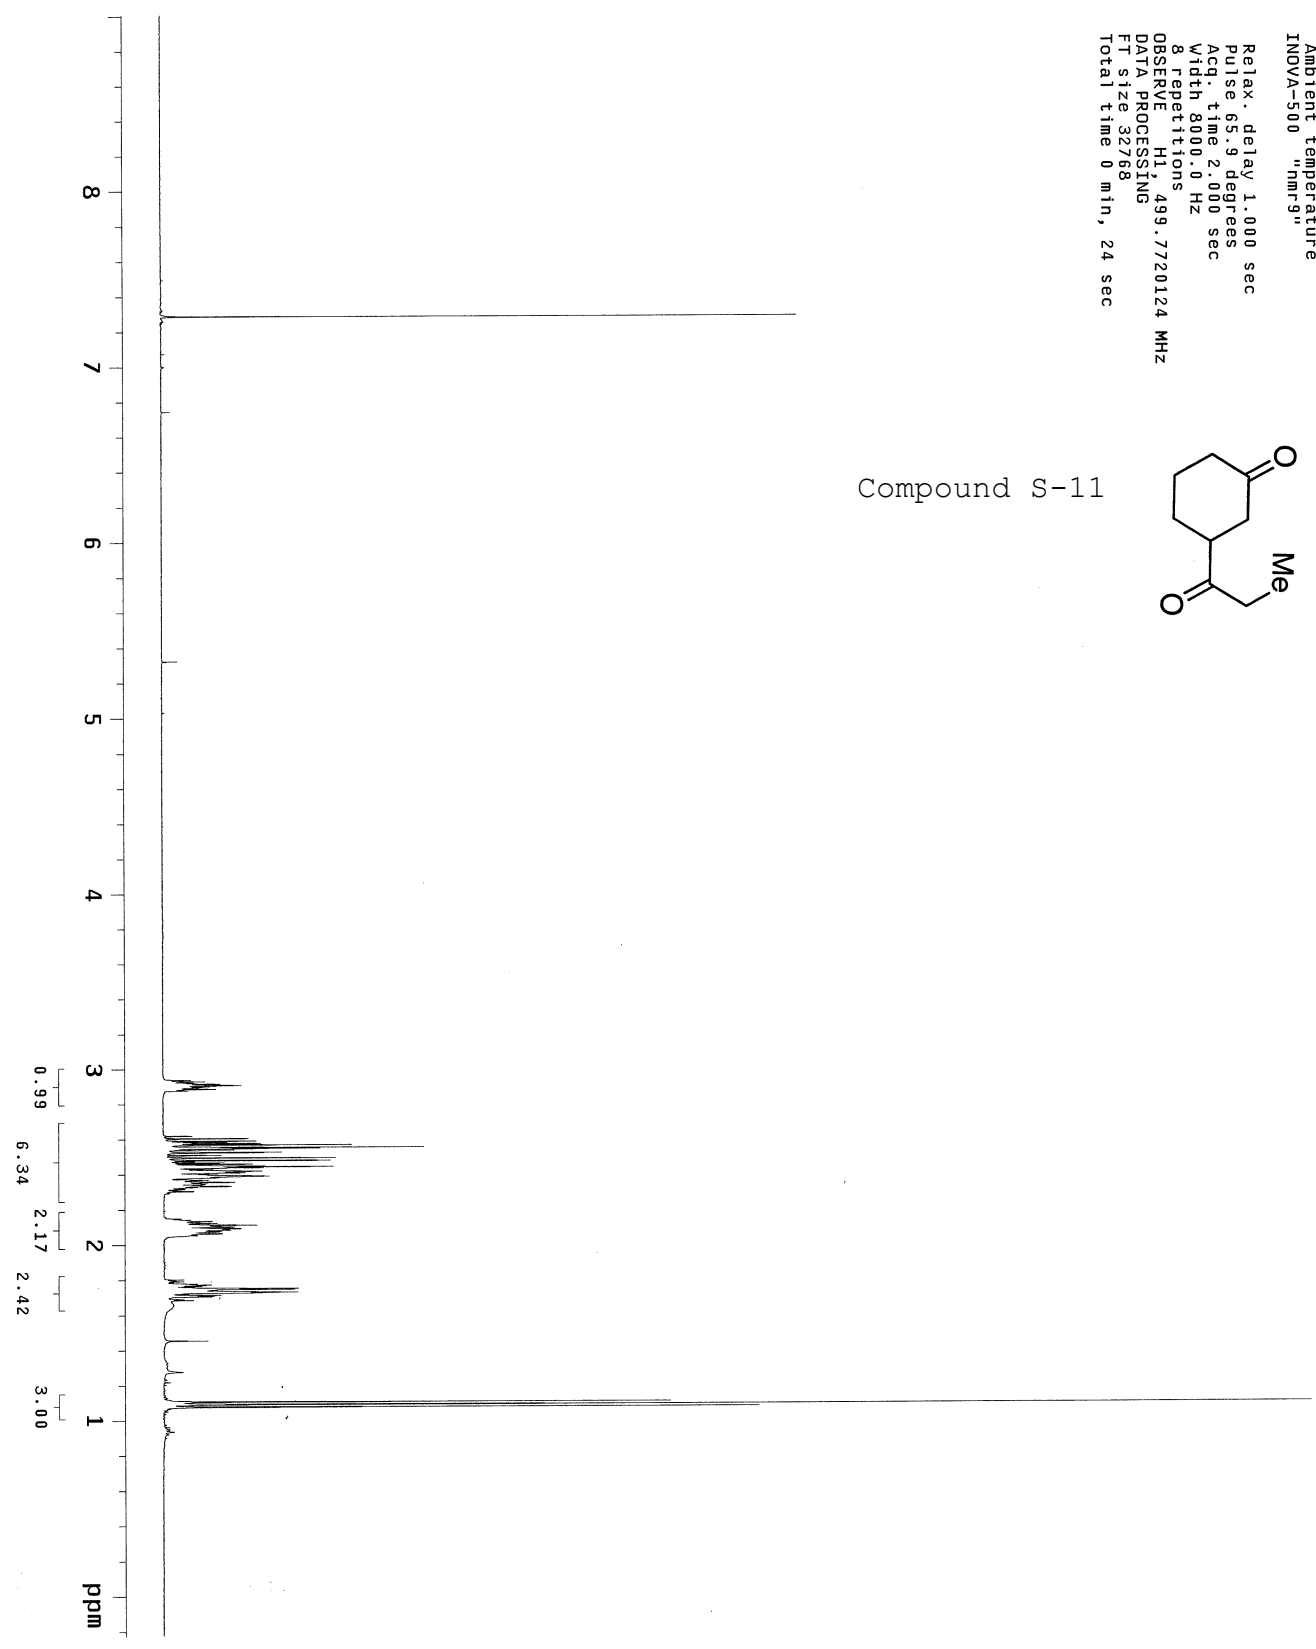

Std carbon

exp32 Carbon

SAMPLE 17 2009  
date Jul 17 2009  
solvent cdcl3  
file exp  
ACQUISITION  
sw 36764.7  
at 1.300  
np 95624  
fb 17000  
ds 1.000  
dl 1.000  
nt 236  
ct 32  
TRANSMITTER  
tn C13  
sfreq 150.809  
tof 1140.3  
tpwr 57  
pw 3.800  
DECOUPLER H1  
dn H1  
dof 0  
dm YVY  
dmm W  
dpwr 46  
dmf 14706  
SPECIAL  
temp 26.0  
gain 30  
sp1n 20  
hst 0.008  
pw90 7.600  
alfa 10.000  
FLAGS  
i1 n  
in n  
dp y  
hs n  
hs nn  
PROCESSING  
lb 0.50  
fn not used  
DISPLAY  
sd -2549.1  
wd 36764.7  
rf1 2549.1  
rfp 0  
tp 47.5  
PLOT  
wc 250  
sc 0  
vs 6429  
th 5  
at cdc ph

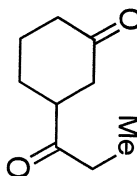

Compound S-11

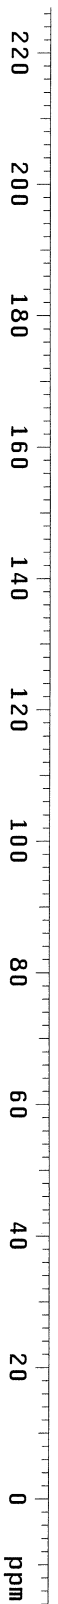

Sample: dwc2-52-1  
File: exp  
Pulse Sequence: s2pu1  
Solvent: cdcl3  
Temp: 26.0 C / 299.1 K  
Operator: jpm  
VMRS-400 "nmr14"  
Relax. delay 1.000 sec  
Pulse 45.0 degrees  
Acq. time 2.049 sec  
Width 6410.3 Hz  
8 repetitions  
OBSERVE H1, 399.7662768 MHz  
DATA PROCESSING  
Resol. enhancement -0.0 Hz  
FT size 65536  
Total time 0 min, 30 sec

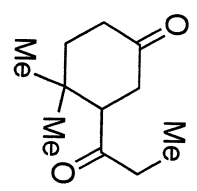

Compound S-12

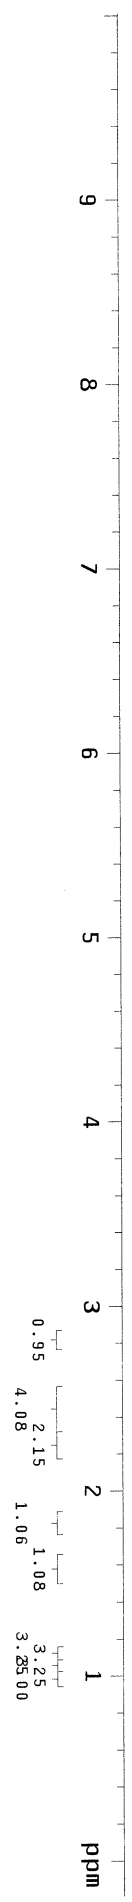

Sample: dmc2-52-2-C  
File: exp

Pulse Sequence: s2pu1  
Solvent: cdcl3  
Temp: 26.0 C / 299.1 K  
Operator: jpm  
VMRS-400 "nmr14"

Relax. delay 1.000 sec  
Pulse 45.0 degrees  
Acq. time 1.300 sec  
Width 24509.8 Hz  
80 repetitions  
OBSERVE C13, 100.5213103 MHz  
DECUPLE H1, 399.7682756 MHz  
Power 40 dB  
continuously on  
WALTZ-16 modulated  
DATA PROCESSING  
Line broadening 0.5 Hz  
FT size 65536  
Total time 38 min, 21 sec

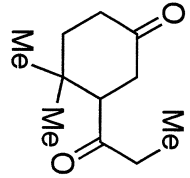

Compound S-12

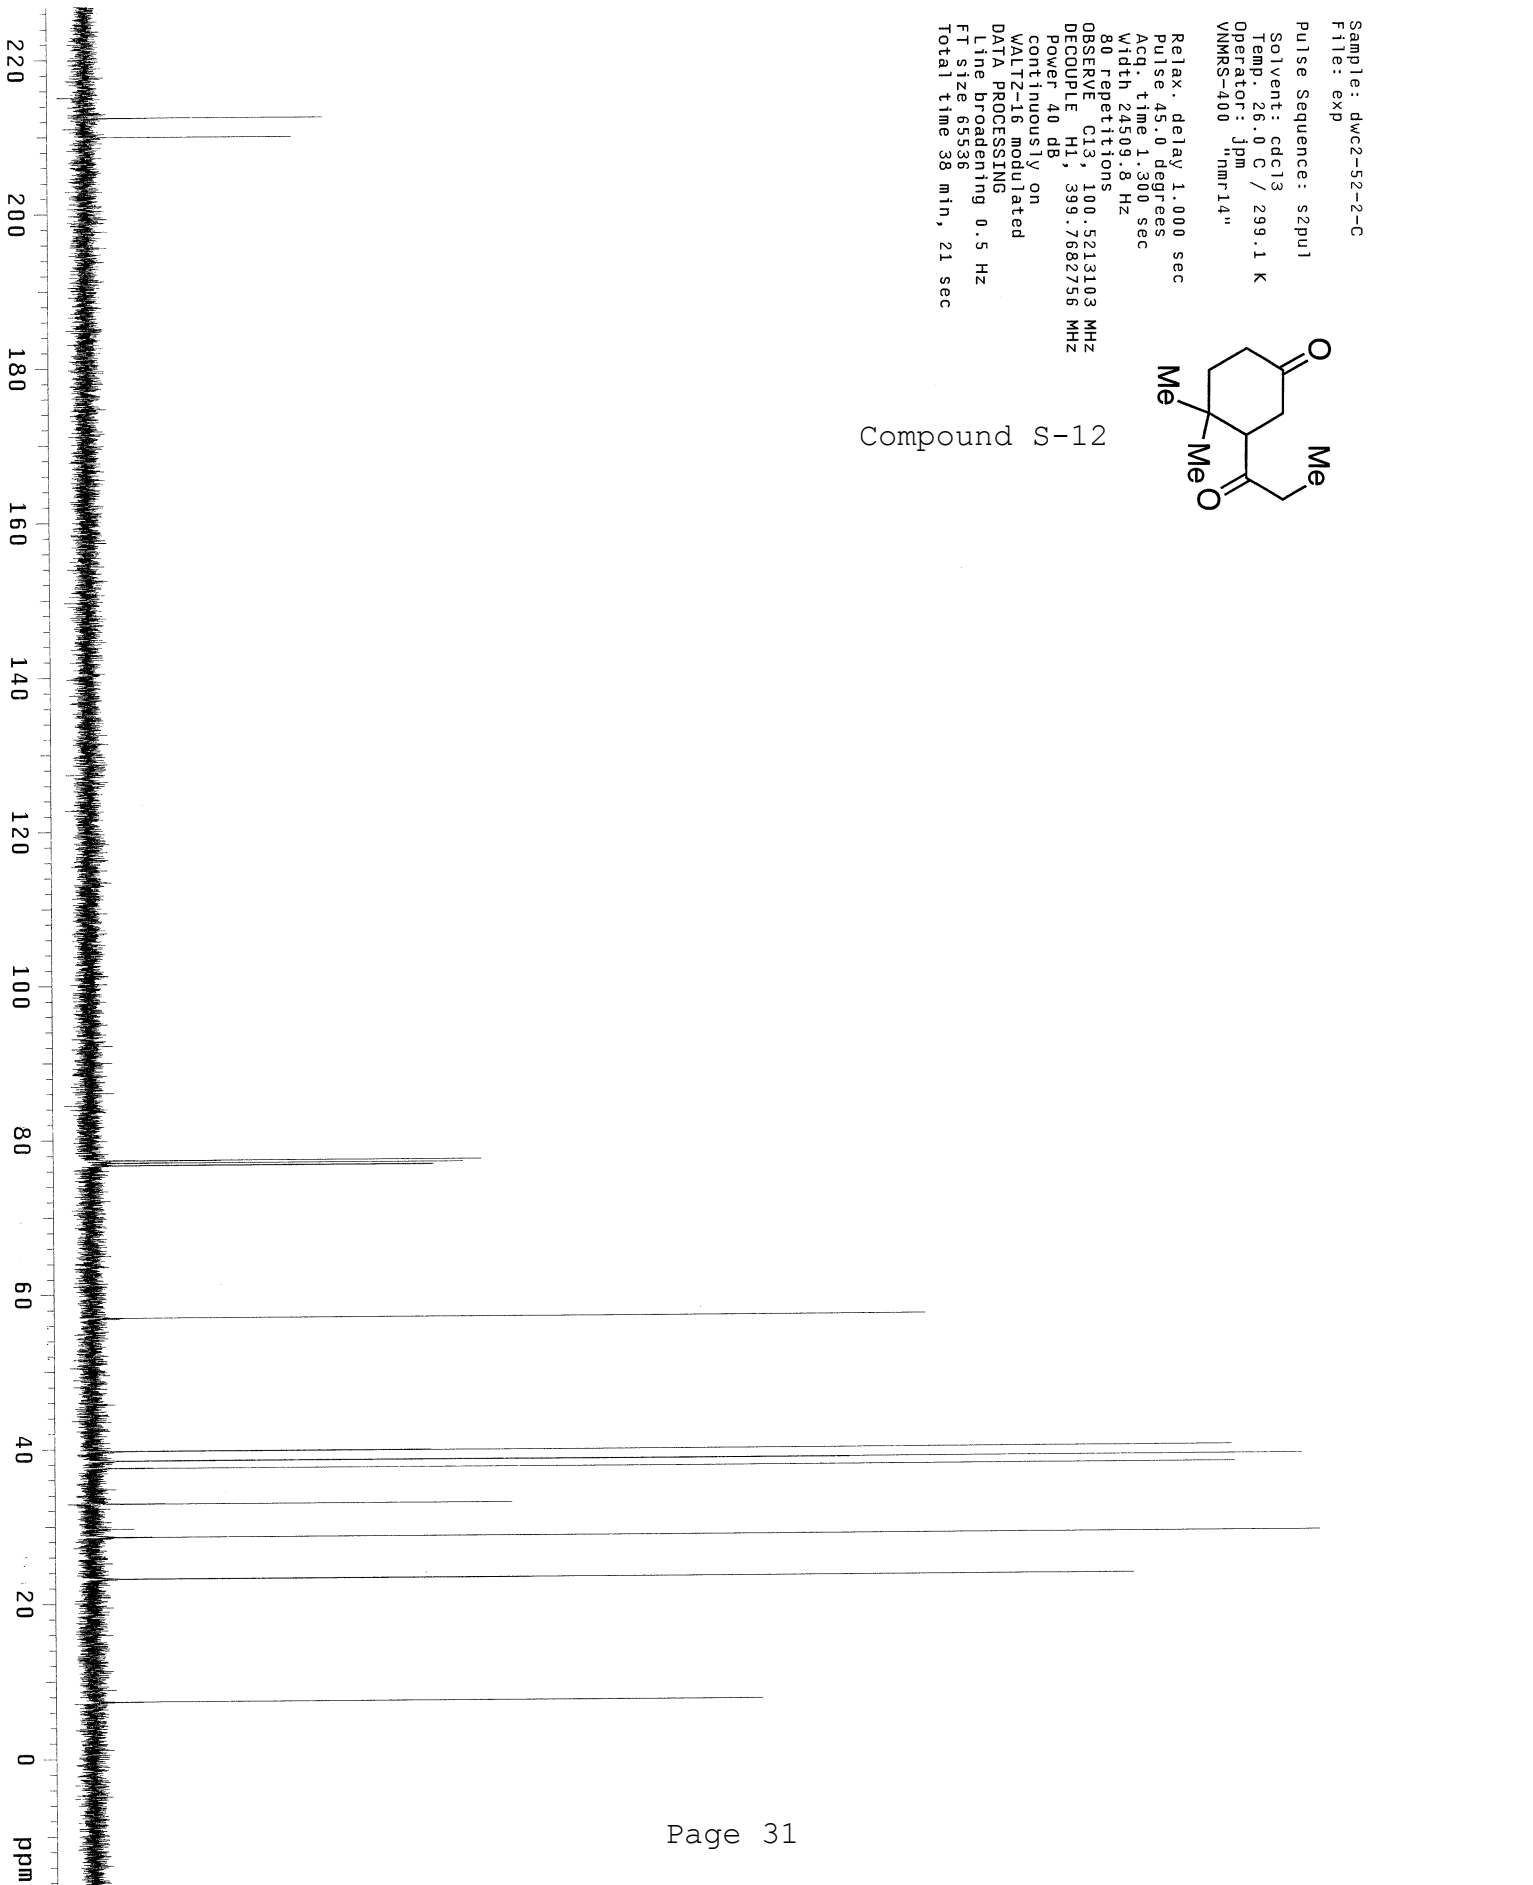

Sample: dwc2-69-3  
File: exp  
Pulse Sequence: szpu1  
Solvent: cdcl3  
Temp: 25.0 C / 298.1 K  
Operator: moriken  
NMRS-500 "nmr15"

Relax. delay 1.000 sec  
Pulse 45.0 degrees  
Acq. time 2.049 sec  
Width 8012.8 Hz  
8 repetitions  
OBSERVE H1, 499.8853621 MHz  
DATA PROCESSING  
Resol. enhancement -0.0 Hz  
FT size 65536  
Total time 0 min, 30 sec

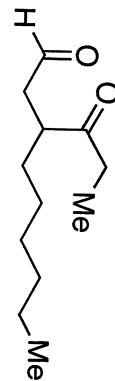

Compound S-13

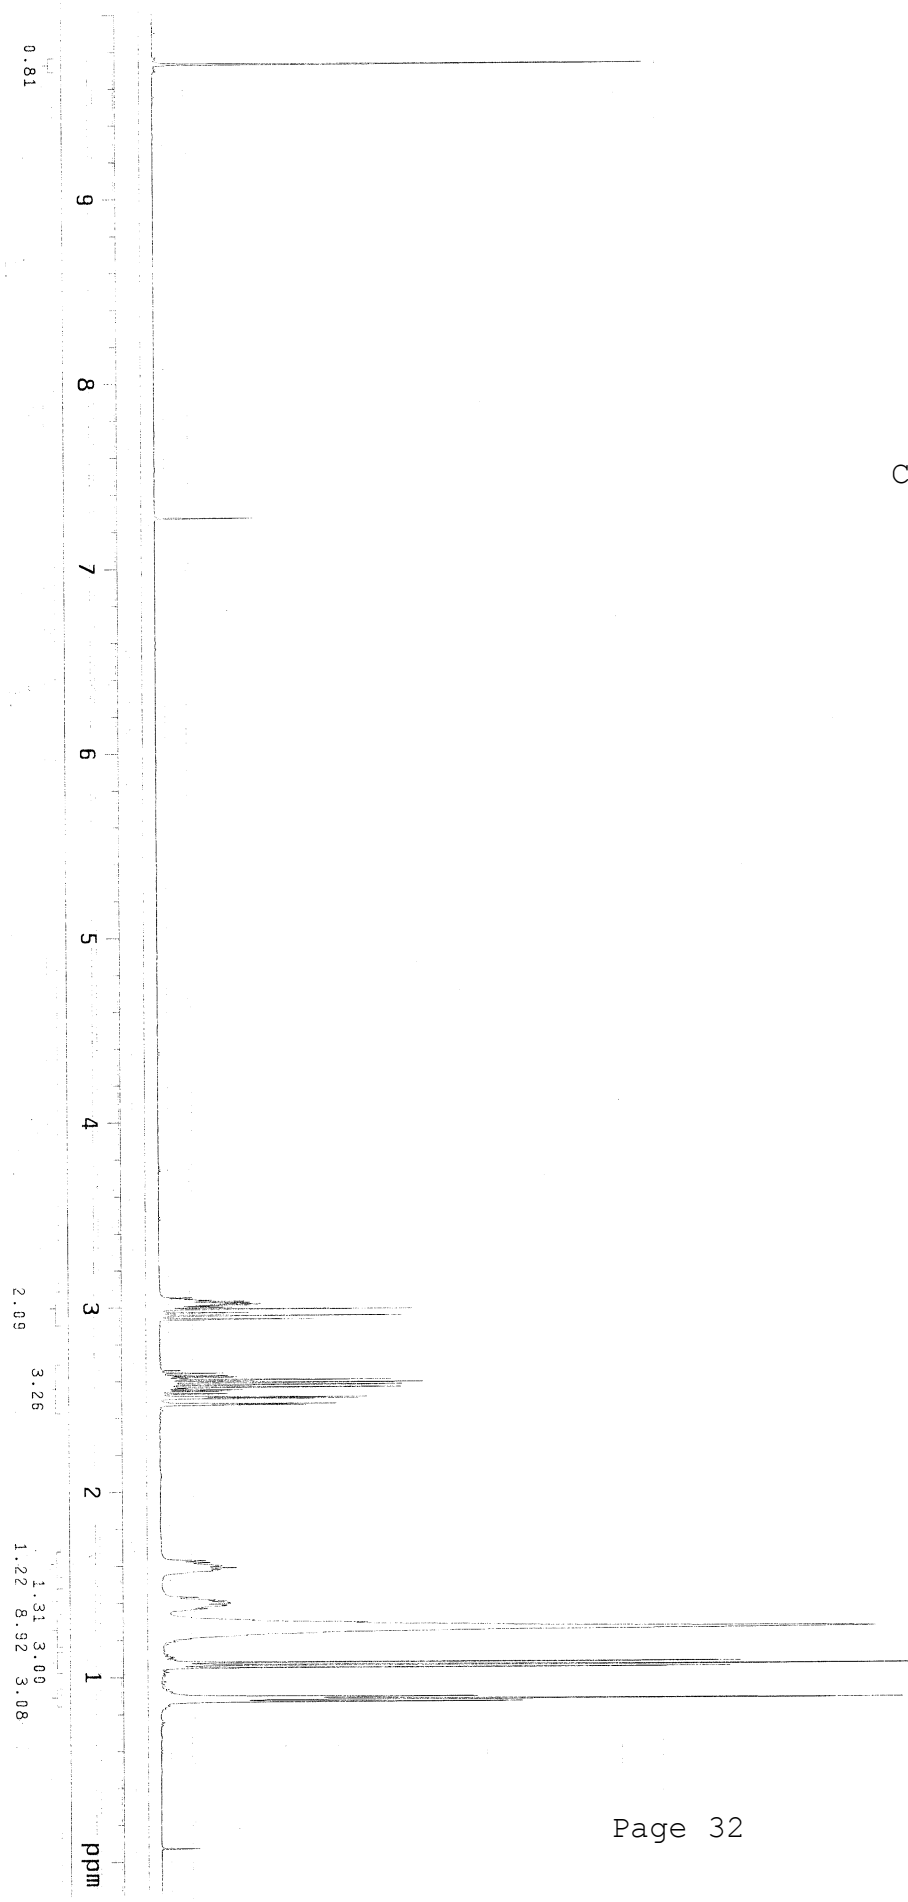



STANDARD 1H OBSERVE - profile  
 Sample: dwc2-69-C  
 File: exp  
 Pulse Sequence: s2pul  
 Solvent: cdcl3  
 Temp: 25.0 C / 298.1 K  
 Operator: moriken  
 VNMRS-500 "nmr15"

Relax. delay 1.000 sec  
 Pulse 45.0 degrees  
 Acq. time 1.300 sec  
 Width 33783.8 Hz  
 416 Repetitions  
 OBSERVE C13, 125.6962743 MHz  
 DECOUPLE H1, 499.8878613 MHz  
 Power 40 db  
 continuously on  
 WALTZ-16 modulated  
 DATA PROCESSING  
 Line broadening 0.5 Hz  
 FT size 131072  
 Total time 38 min, 21 sec

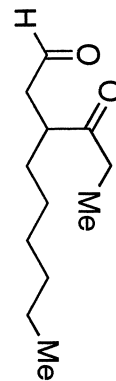

Compound S-13

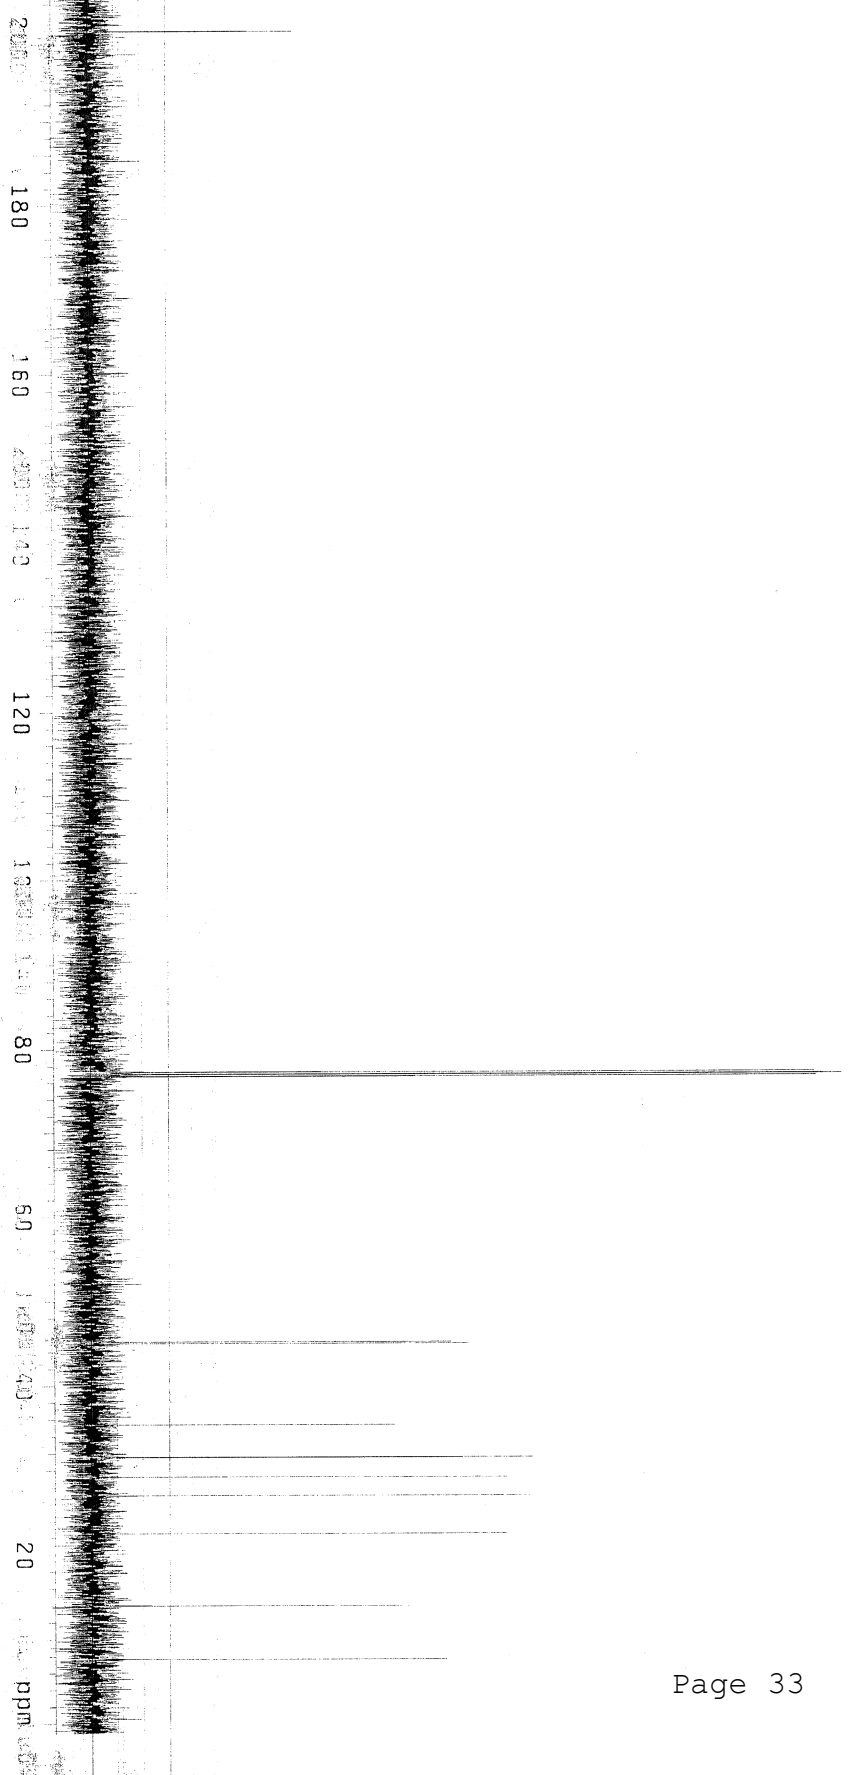

| INDEX | FREQUENCY | PPM     | HEIGHT |
|-------|-----------|---------|--------|
| 1     | 26813.5   | 213.319 | 8.6    |
| 2     | 25232.4   | 200.741 | 27.0   |
| 3     | 9712.3    | 77.268  | 95.3   |
| 4     | 9679.8    | 77.009  | 98.8   |
| 5     | 9647.8    | 76.755  | 95.5   |
| 6     | 5678.0    | 45.172  | 47.3   |
| 7     | 5655.8    | 44.996  | 49.7   |
| 8     | 4446.4    | 35.375  | 40.2   |
| 9     | 3966.5    | 31.556  | 58.0   |
| 10    | 3965.0    | 31.544  | 48.7   |
| 11    | 3673.2    | 29.223  | 54.5   |
| 12    | 3395.3    | 27.012  | 57.6   |
| 13    | 2830.4    | 22.517  | 54.5   |
| 14    | 1757.1    | 13.979  | 41.8   |
| 15    | 962.2     | 7.655   | 46.7   |

cinnaz

Pulse Sequence: s2pu1

Solvent: CDCl3

Ambient temperature

INOVA-500 "nmr-9"

Relax. delay 1.000 sec

Pulse 90.2 degrees

Acq. time 2.000 sec

Width 8000.0 Hz

8 repetitions

OBSERVE H1, 499.7720124 MHz

DATA PROCESSING

FT size 32768

Total time 0 min, 24 sec

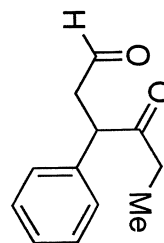

Compound S-14

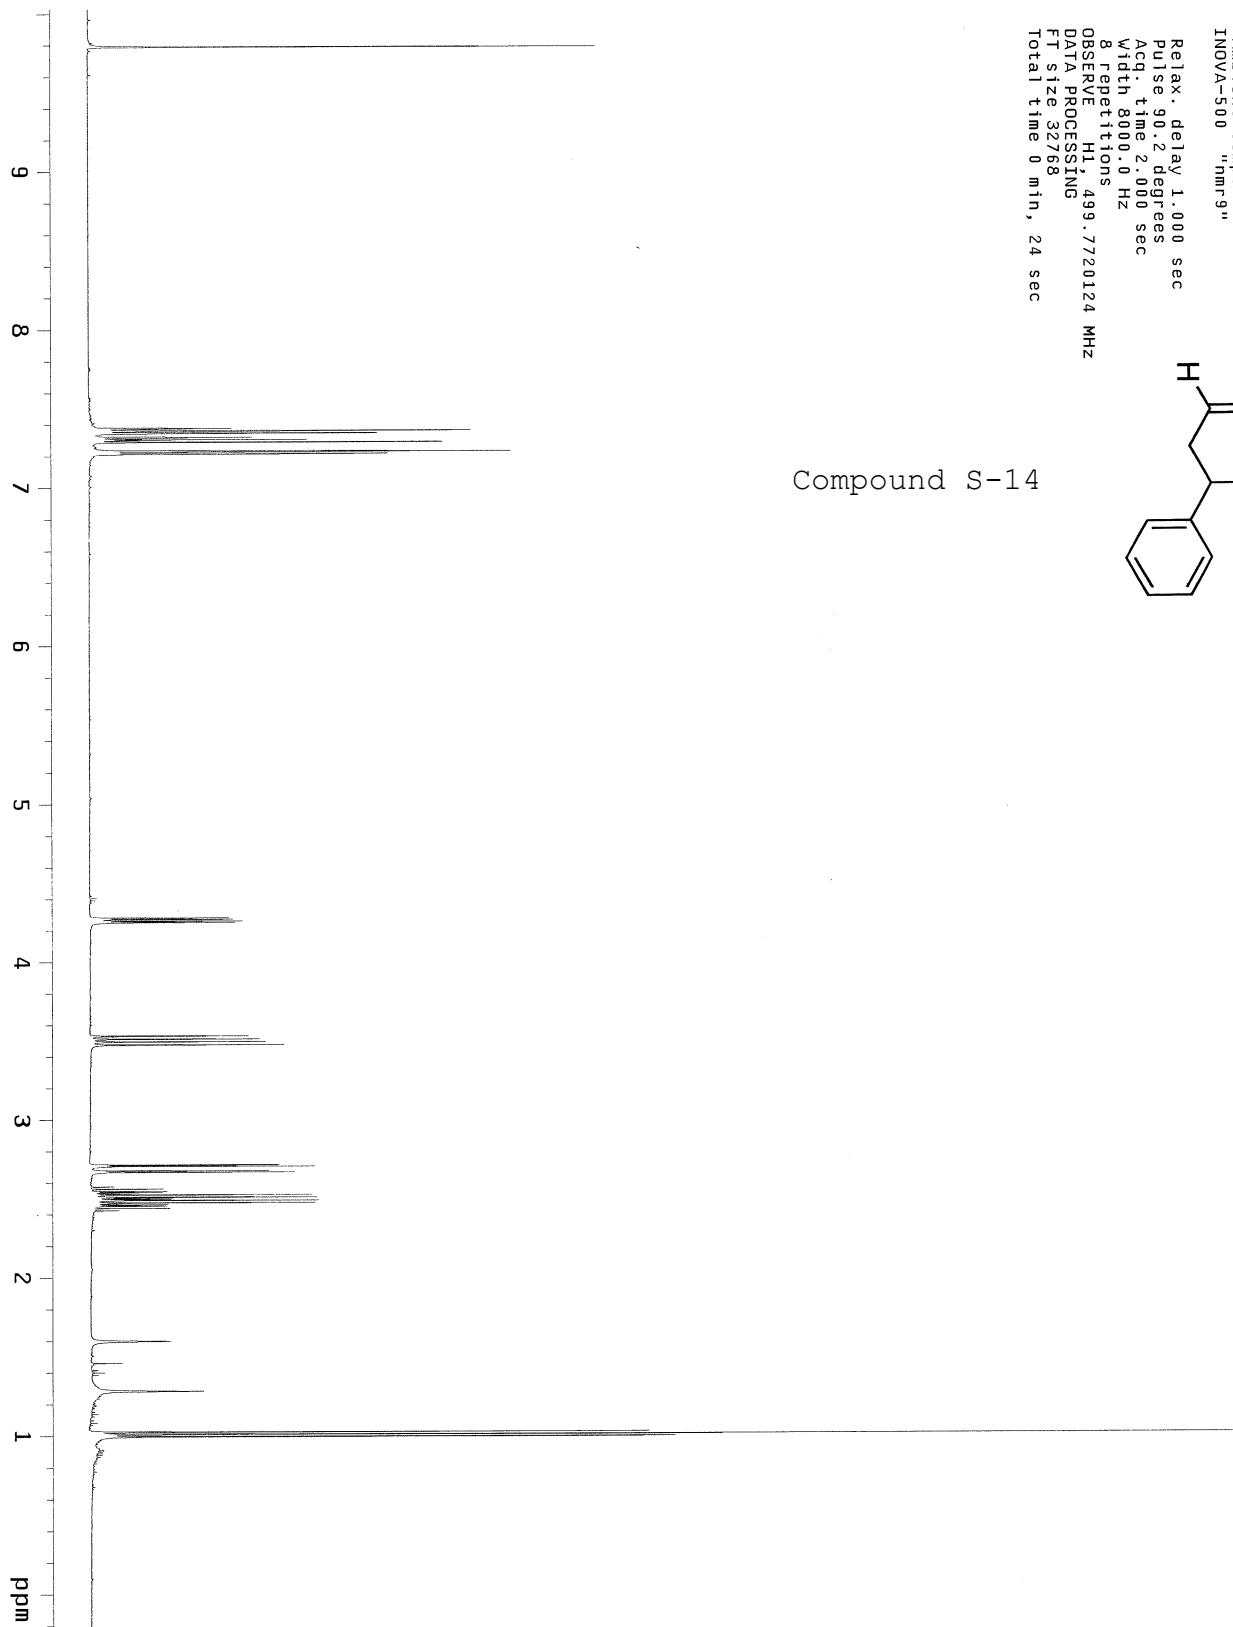

Sample: dwc2-cinnamaldehyde\_C  
File: exp

Pulse Sequence: s2pu1

Solvent: cdcl3

Temp: 26.0 C / 299.1 K

Operator: vnmr1

VNMR-400 "hmr14"

Relax. delay 1.000 sec

Pulse 45.0 degrees

Acq. time 1.301 sec

Width 26595.7 Hz

96 repetitions

OBSERVE C13, 100.5213103 MHz

DECUPLE H1, 399.7682756 MHz

Power 40 dB

Continuously ON

VALTZ-16 modulated

DATA PROCESSING

Line broadening 0.5 Hz

FT size 131072

Total time 38 min, 21 sec

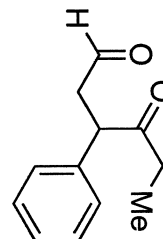

Compound S-14

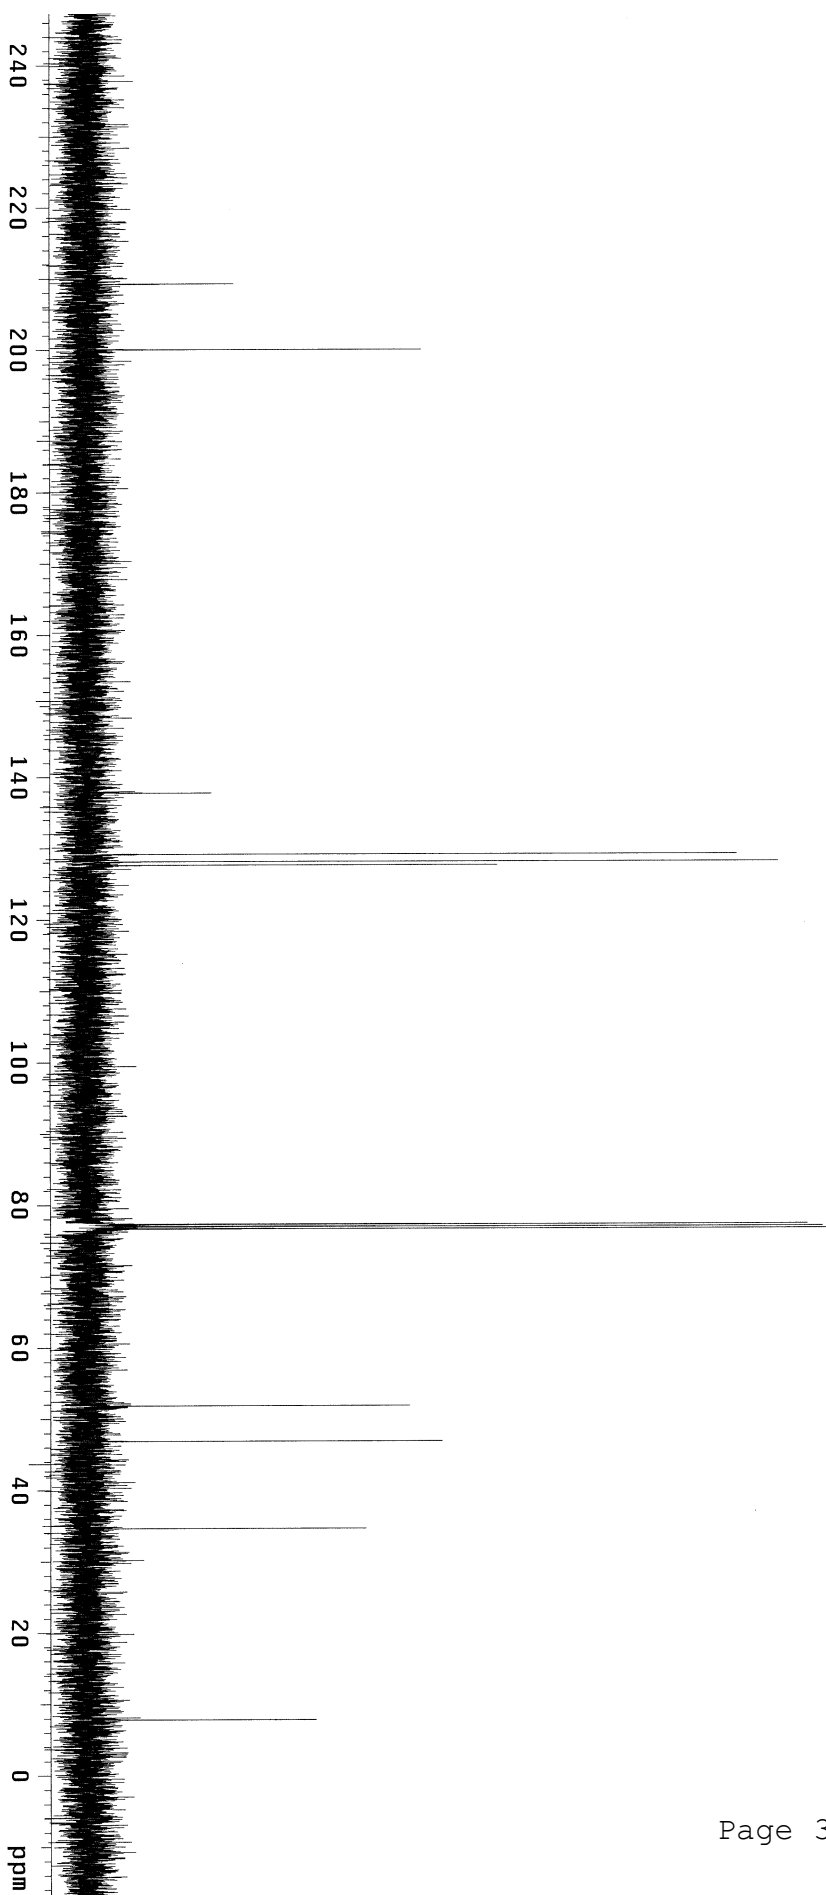

Sample: a-substitution  
File: exp  
Pulse Sequence: s2pu1  
Solvent: cdcl3  
Temp: 26.0 C / 299.1 K  
Operator: vnmr1  
VNMRS-400 "nmr14"

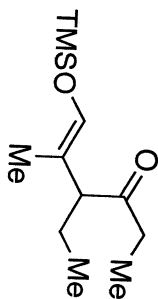

Relax. delay 1.000 sec  
Pulse 45.0 degrees  
Acq. time 2.049 sec  
Width 6410.3 Hz  
8 repetitions  
OBSERVE H1, 399.7662768 MHz  
DATA PROCESSING  
Resol: enhancement -0.0 Hz  
FT size 65536  
Total time 0 min, 30 sec

Compound S-15

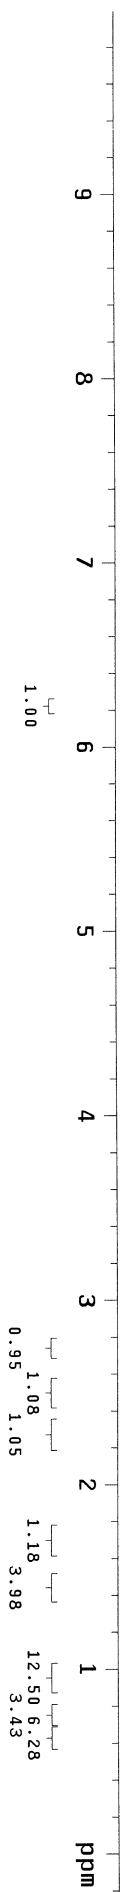

Sample: a-substitution  
File: exp  
Pulse Sequence: szpu1  
Solvent: cdcl3  
Temp: 26.0 C / 299.1 K  
Operator: vnmr1  
VNMRS-400 "nmr14"

Relax. delay 1.000 sec  
Pulse 45.0 degrees  
Acq. time 1.300 sec  
Width 24509.8 Hz  
16 Repetitions  
OBSERVE C13, 100.5213103 MHz  
DECUPLE H1, 399.7682756 MHz  
Power 40 dB  
Continuously ON  
WALTZ-16 modulated  
DATA PROCESSING  
Line broadening 0.5 Hz  
FT size 65536  
Total time 2 min, 27 sec

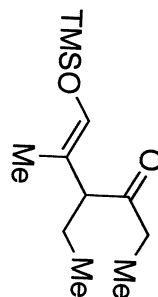

Compound S-15

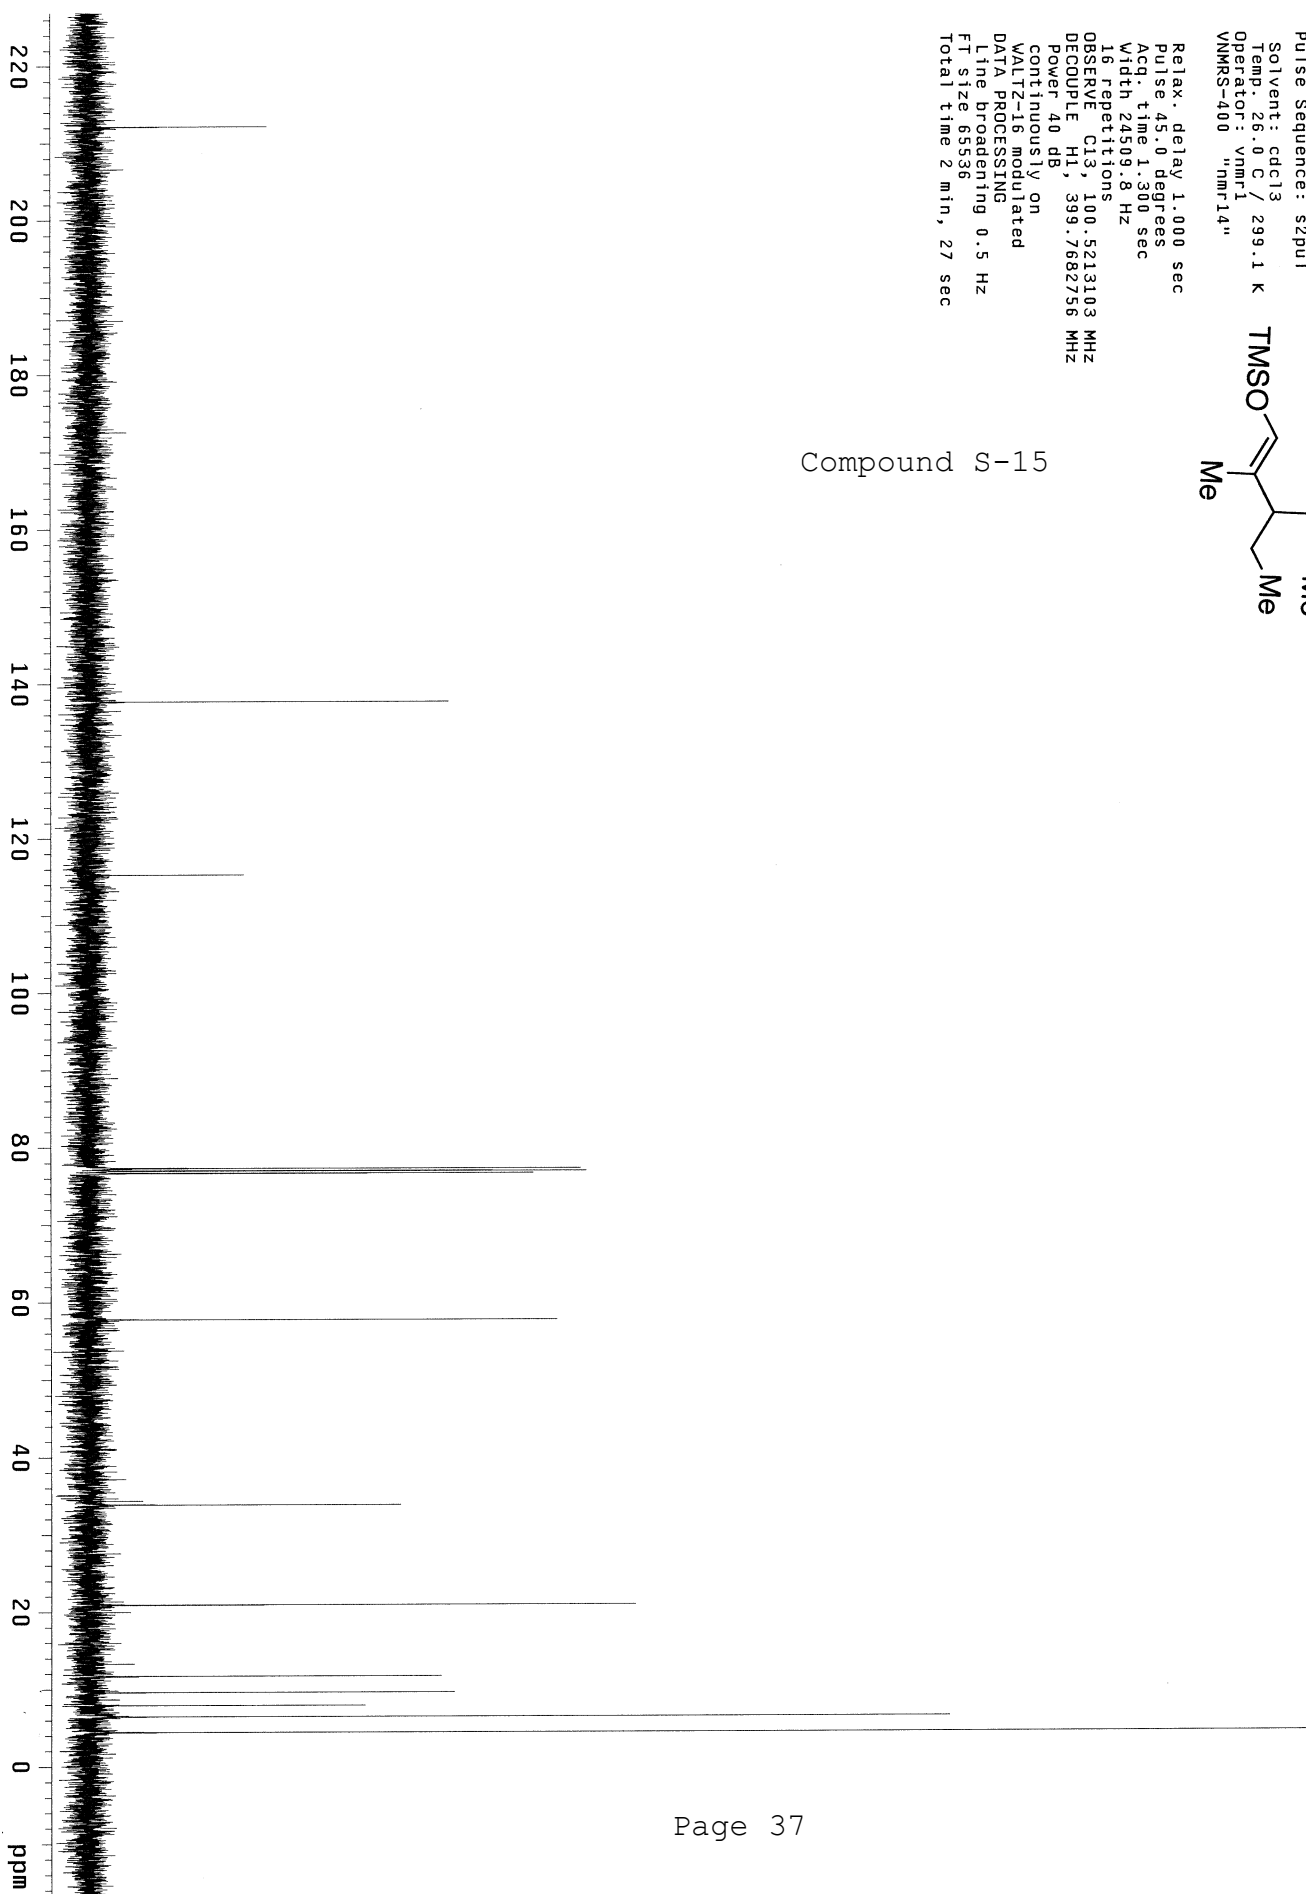

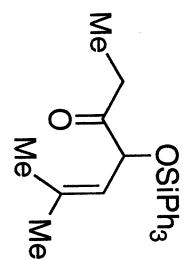

Compound S-16

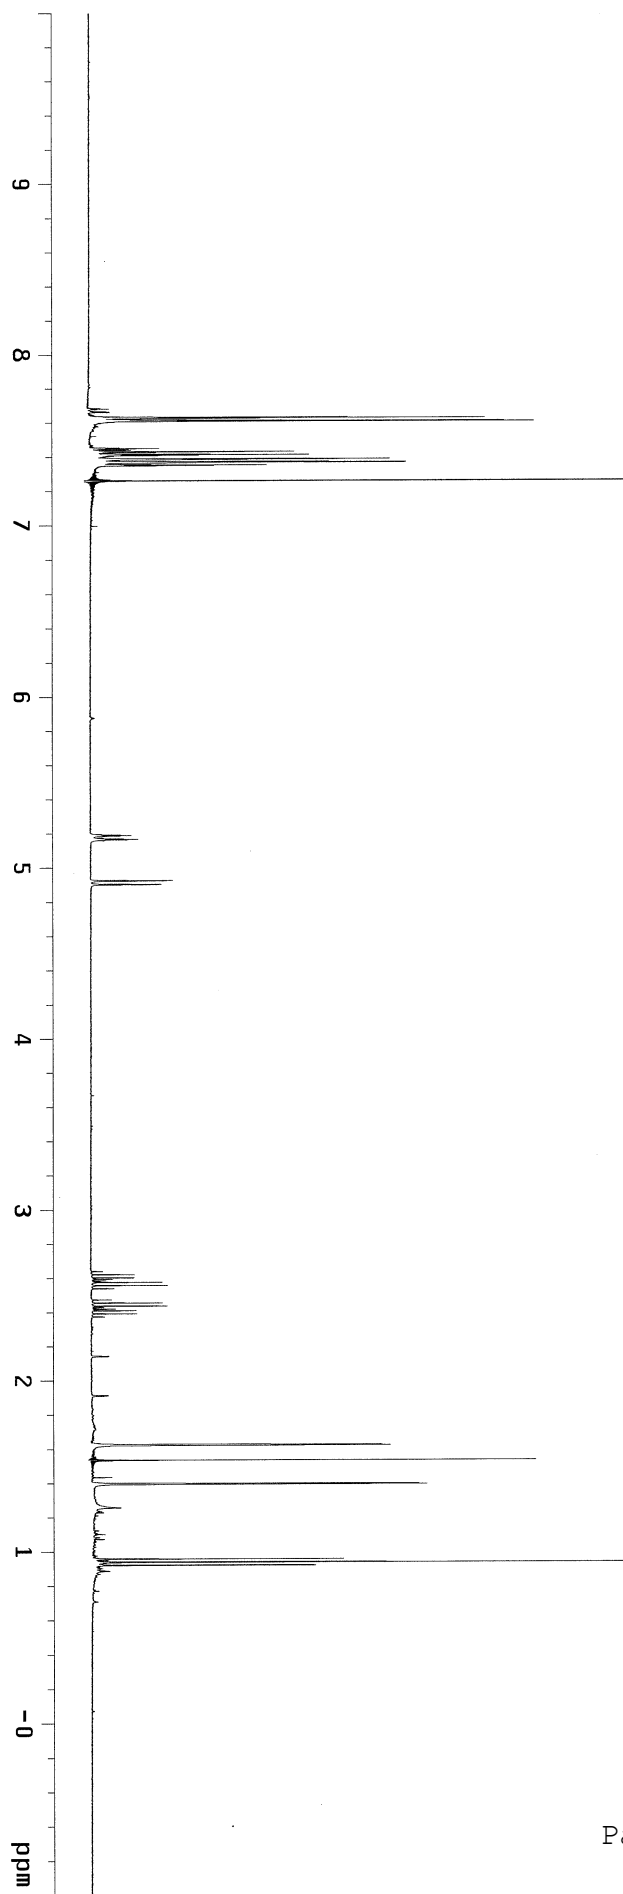

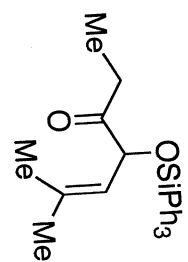

Compound S-16

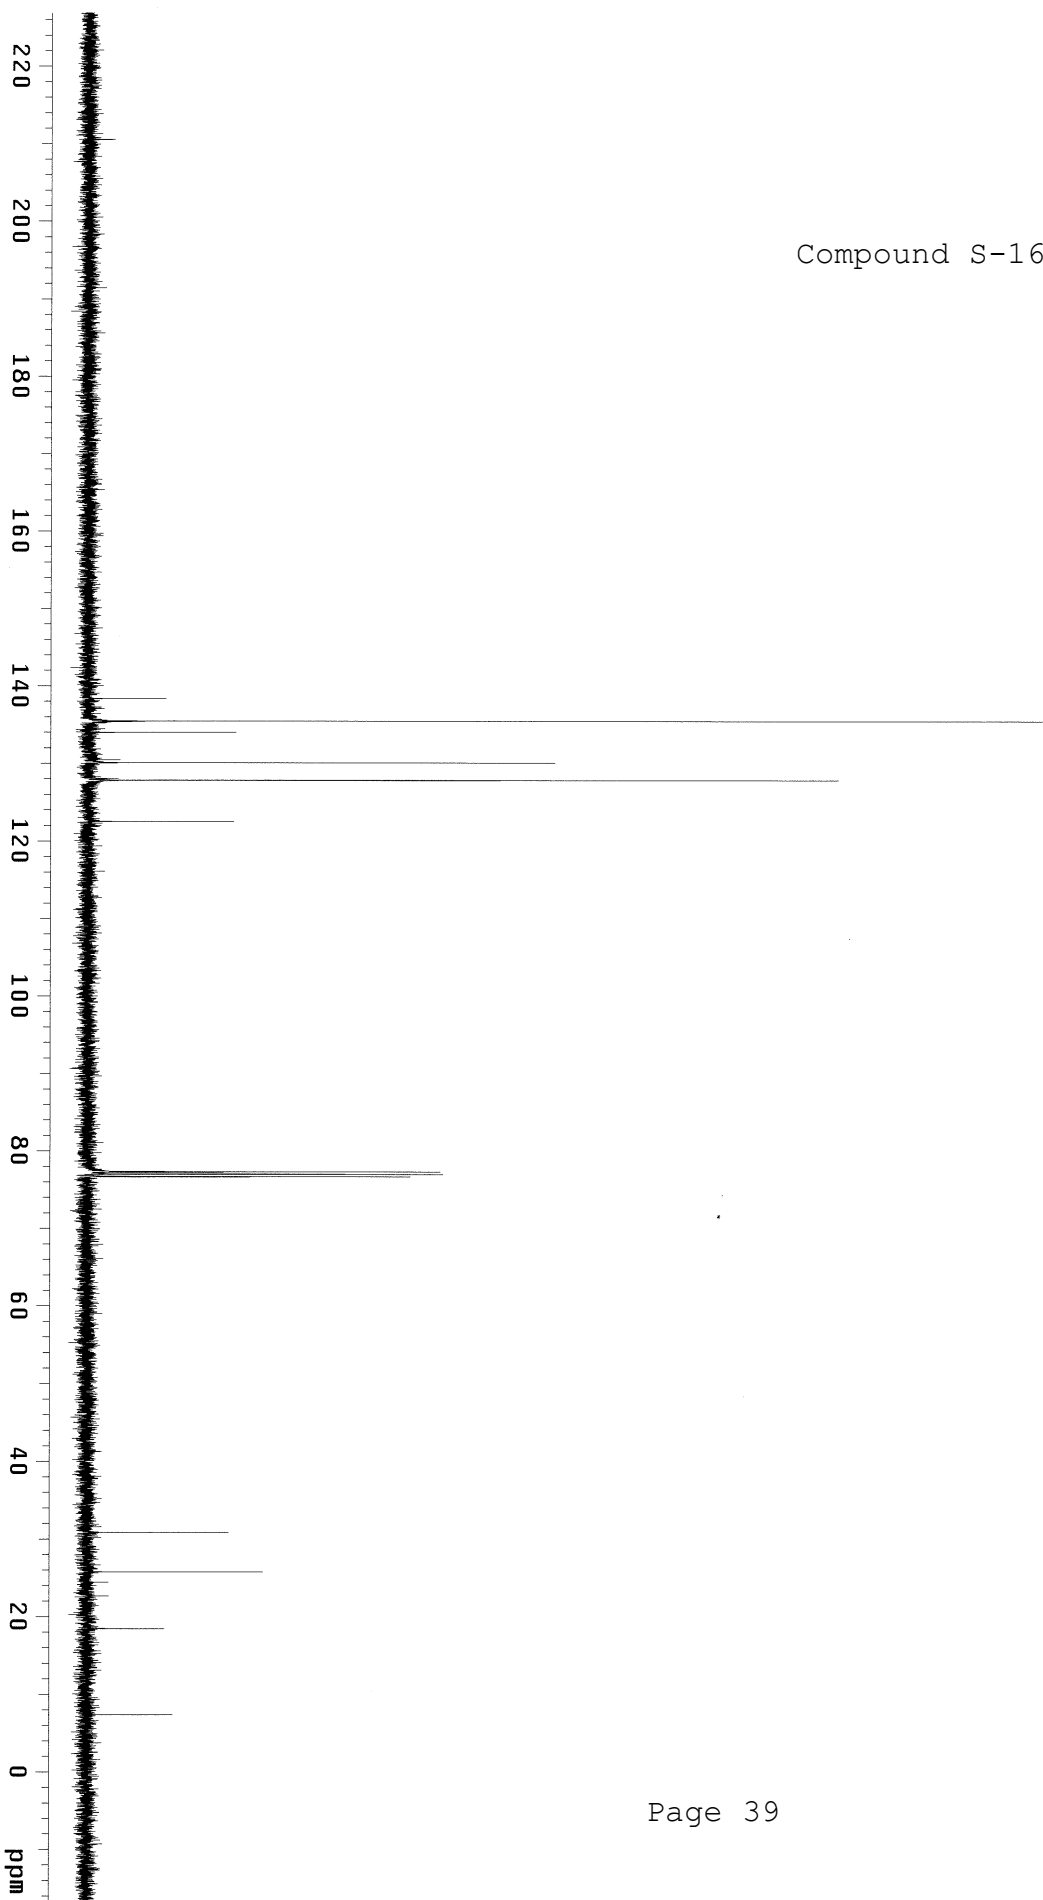

| INDEX | FREQUENCY | PPM     | HEIGHT |
|-------|-----------|---------|--------|
| 1     | 13902.0   | 138.299 | 10.2   |
| 2     | 13613.2   | 135.426 | 126.0  |
| 3     | 13466.6   | 133.968 | 19.5   |
| 4     | 13073.2   | 130.054 | 61.6   |
| 5     | 12847.3   | 127.807 | 99.1   |
| 6     | 12314.7   | 122.509 | 19.2   |
| 7     | 7770.8    | 77.305  | 46.6   |
| 8     | 7764.0    | 77.238  | 17.9   |
| 9     | 7738.6    | 76.985  | 47.0   |
| 10    | 7706.4    | 76.665  | 42.5   |
| 11    | 3098.9    | 30.828  | 18.6   |
| 12    | 2588.0    | 25.746  | 23.2   |
| 13    | 1853.5    | 18.439  | 10.2   |
| 14    | 739.8     | 7.359   | 11.3   |

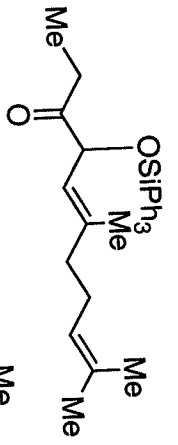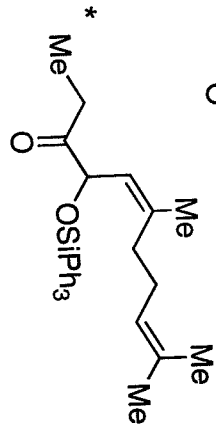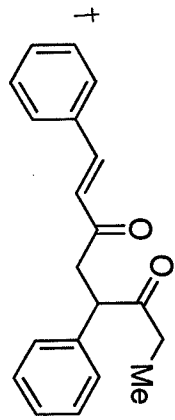

Compound S-17

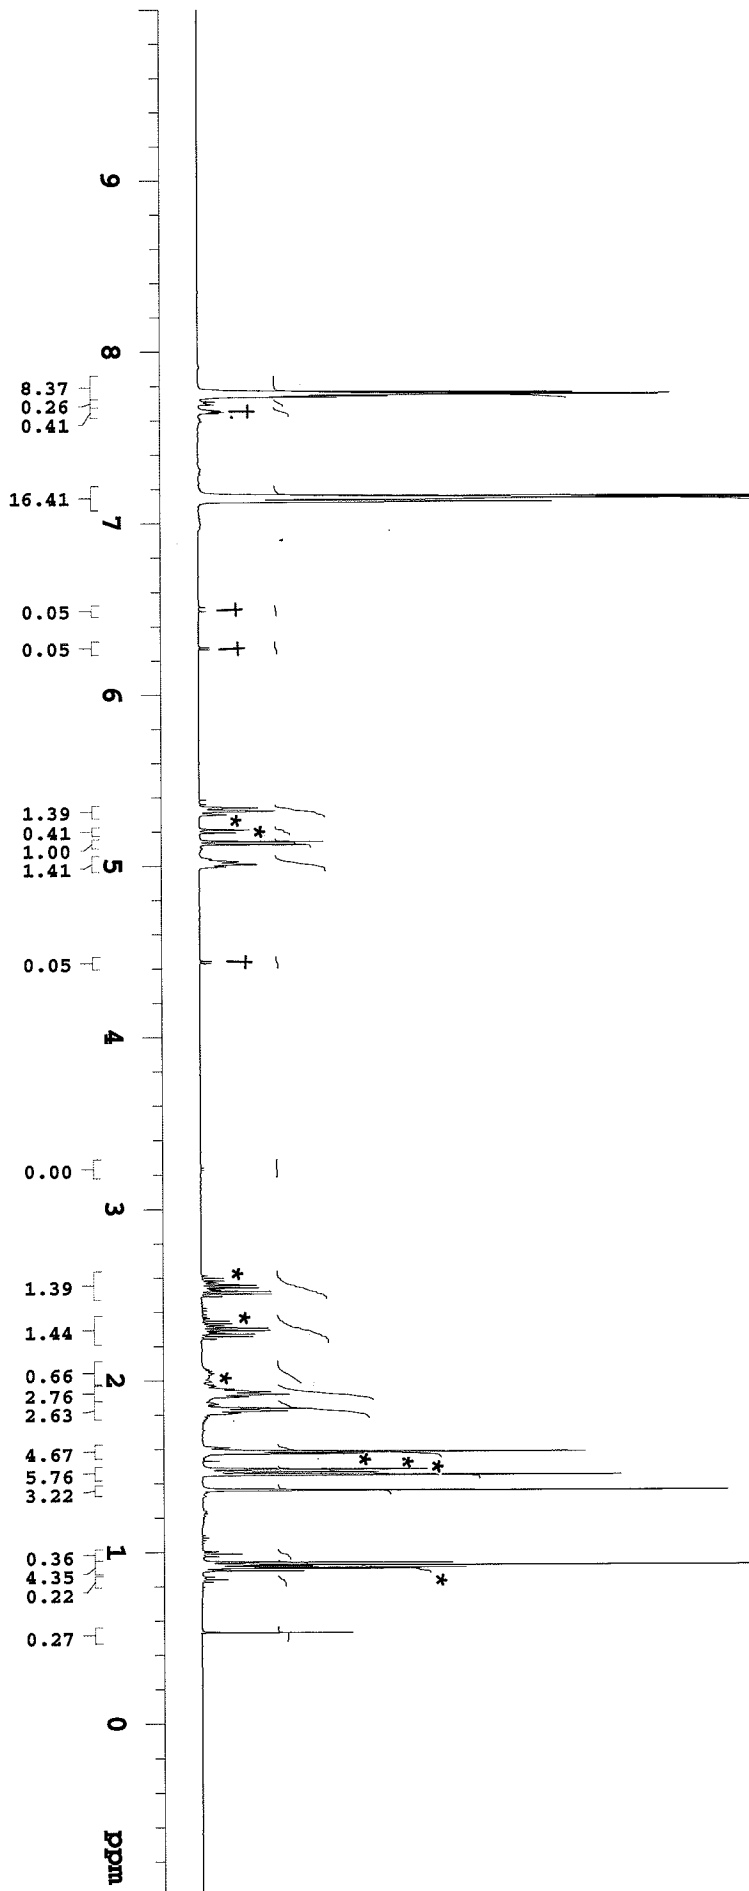



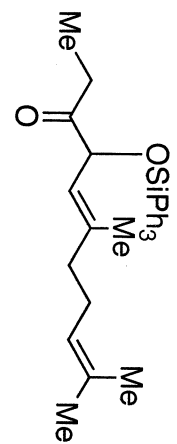

Compound S-17

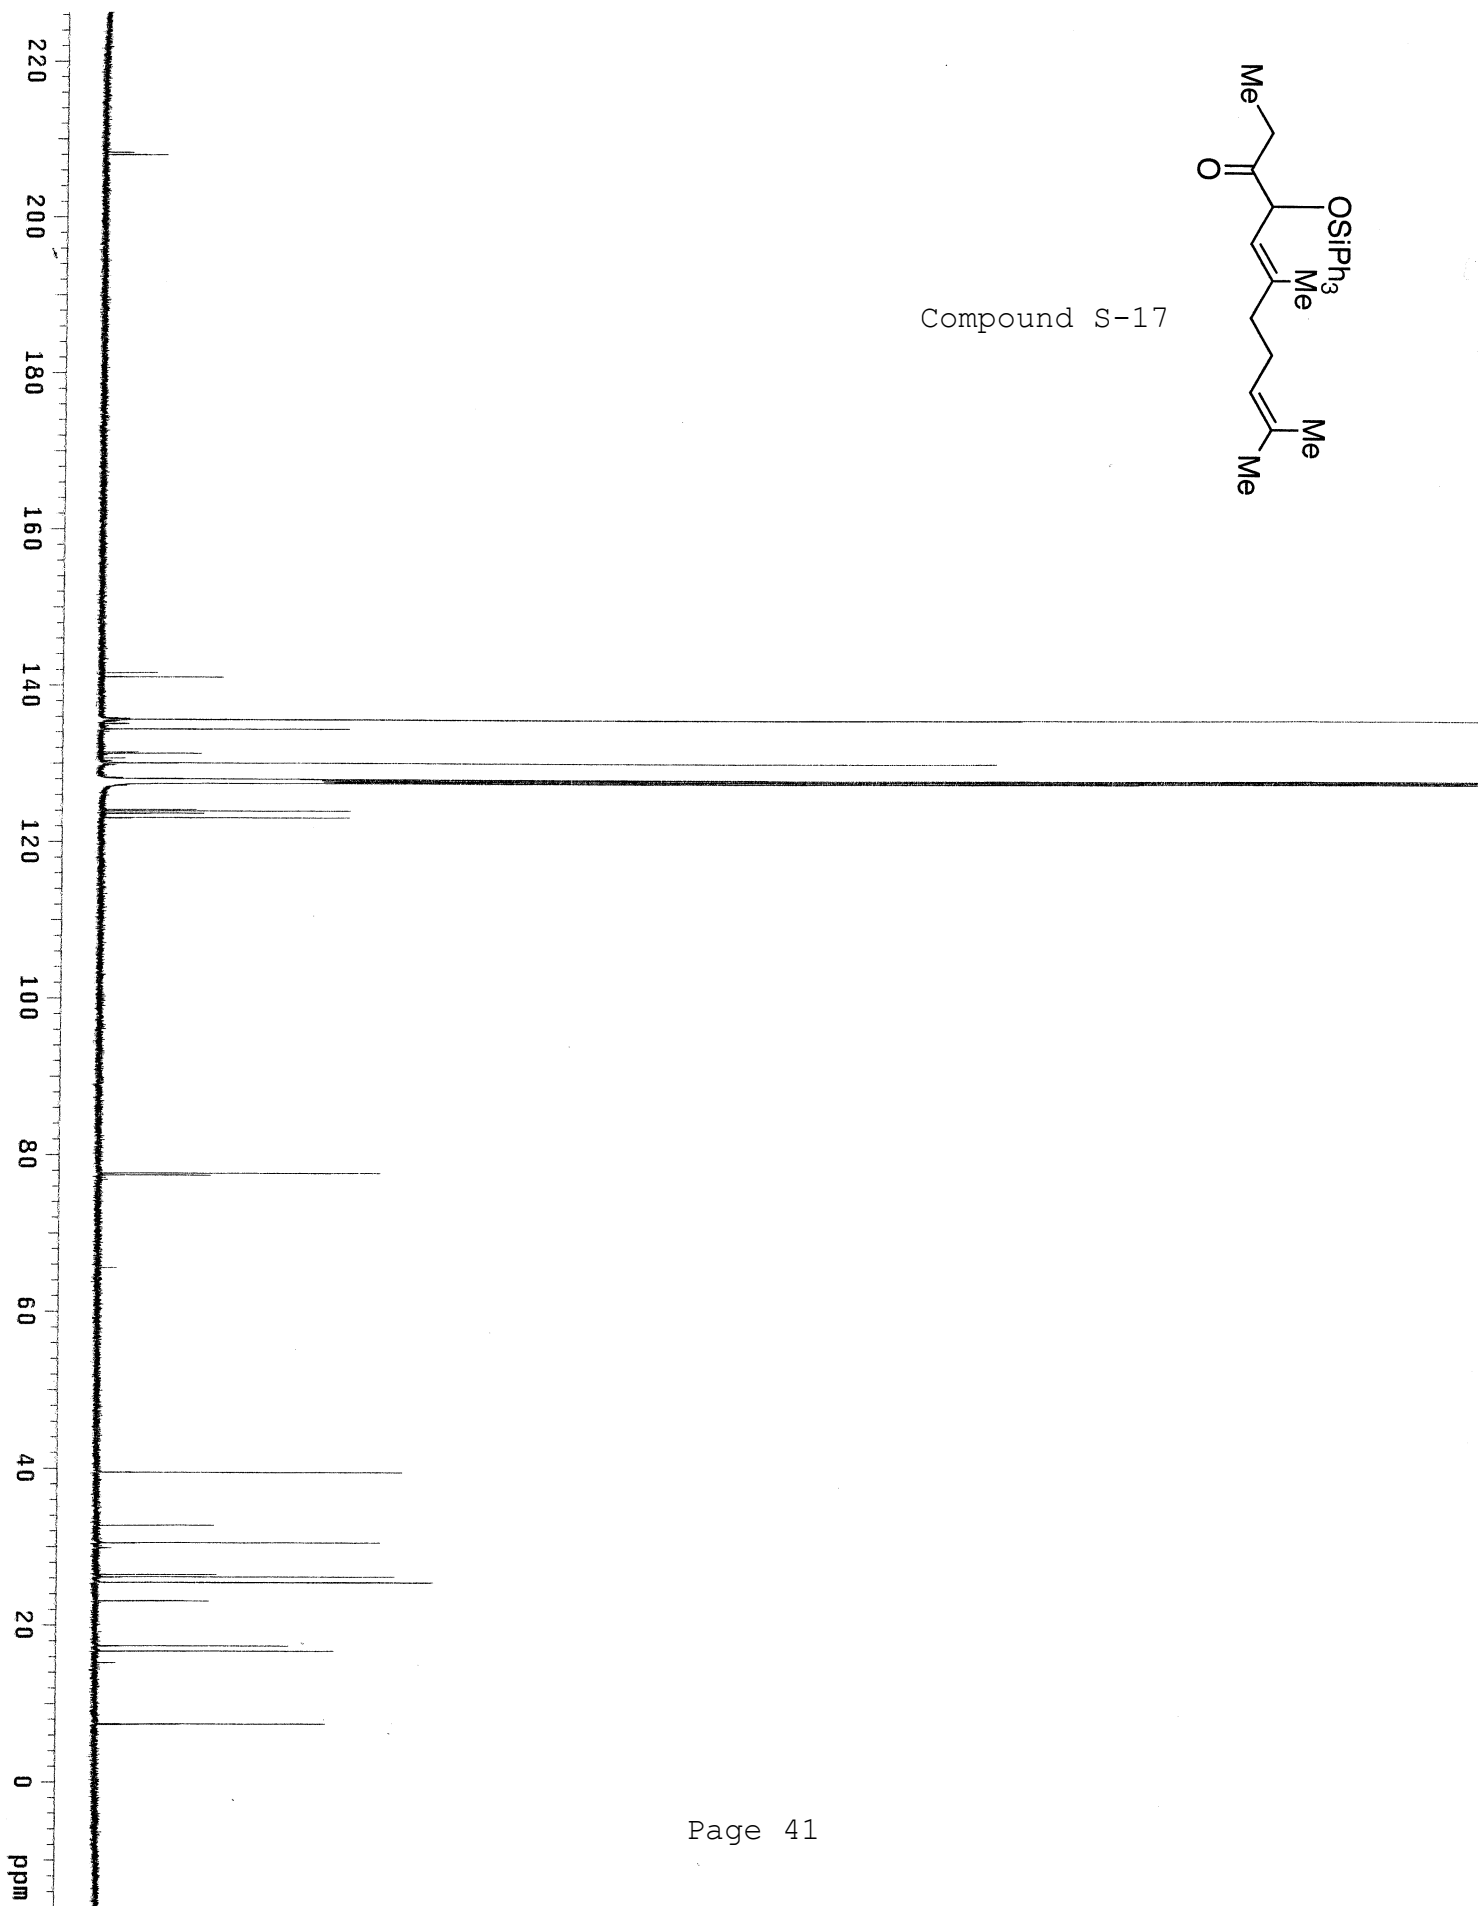

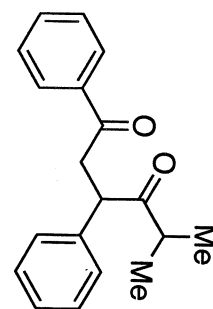

Compound S-18

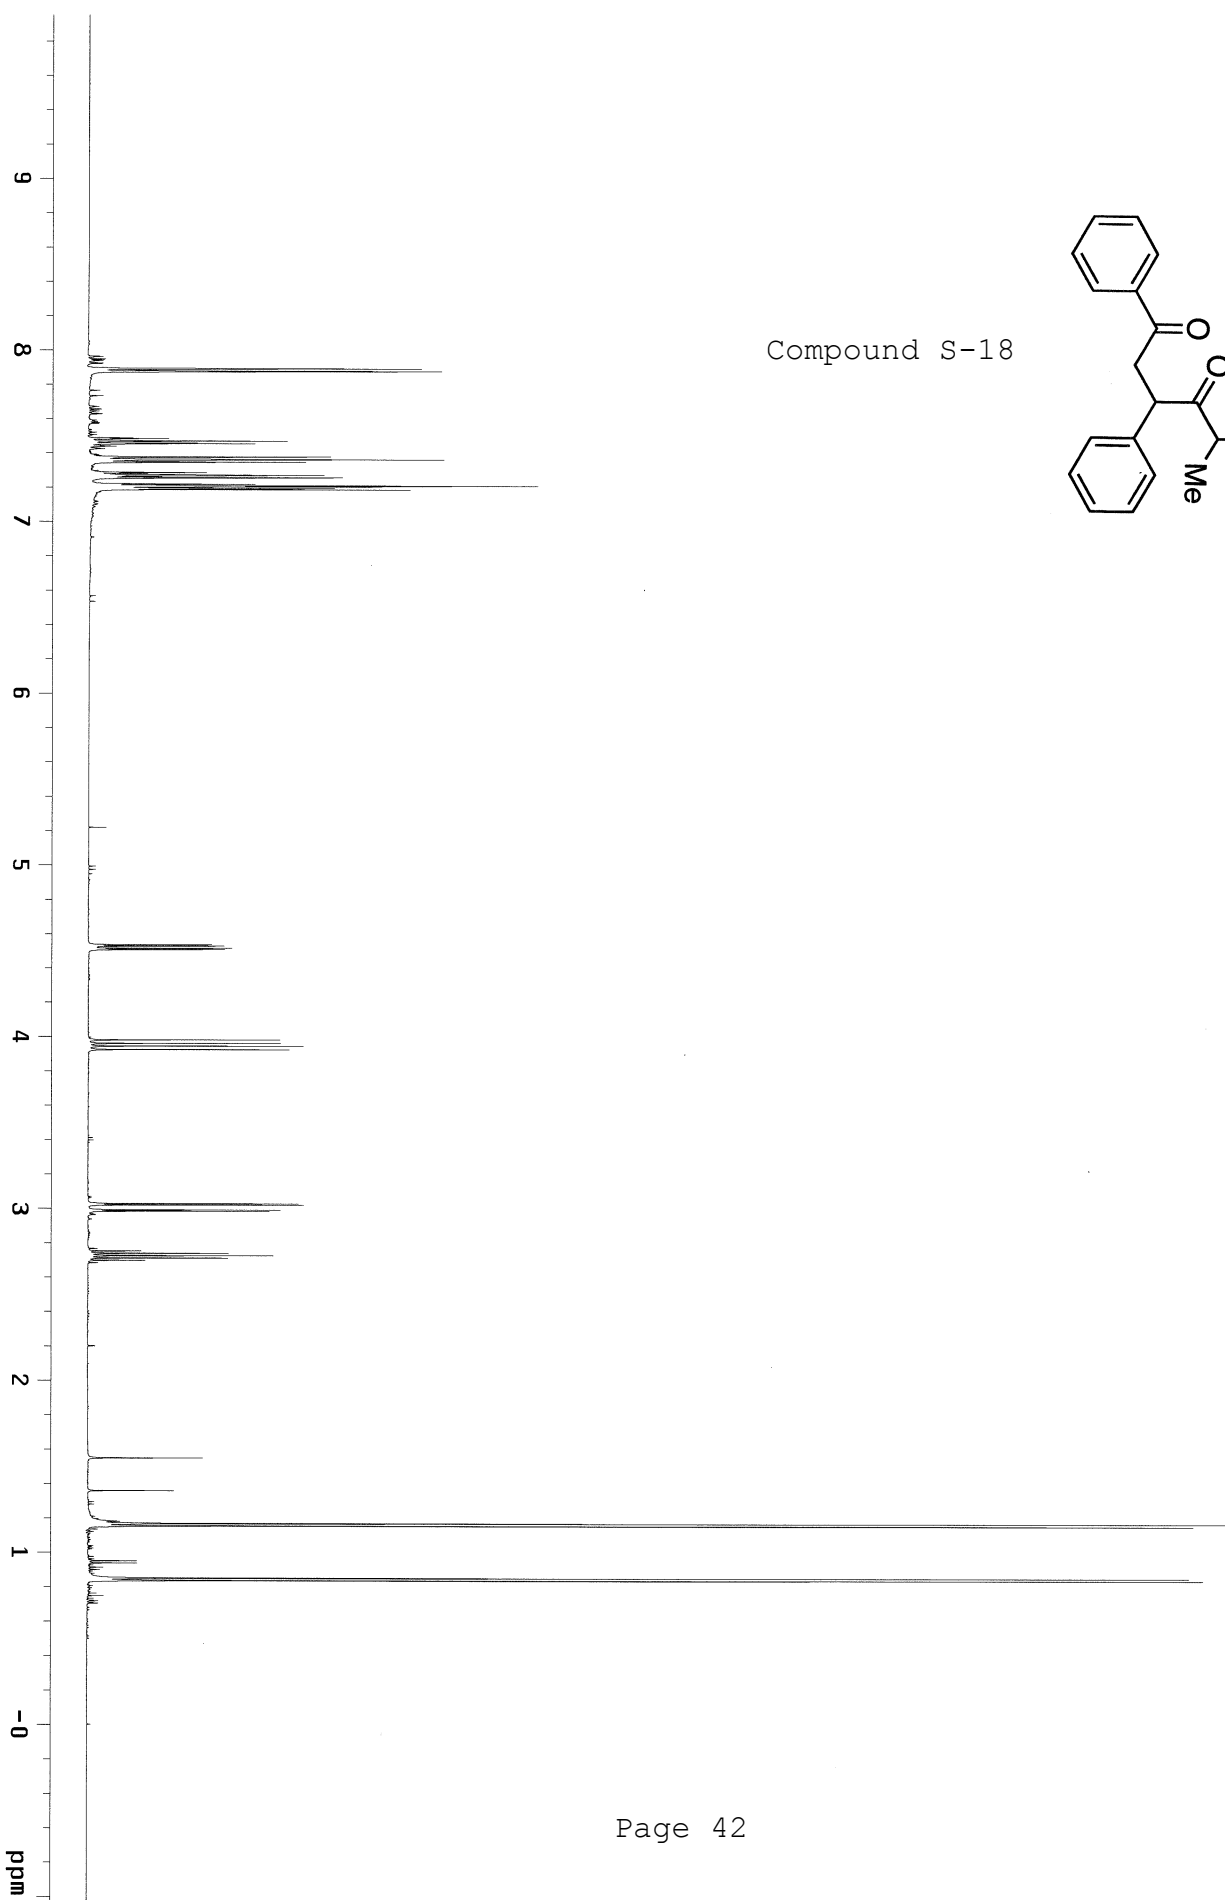

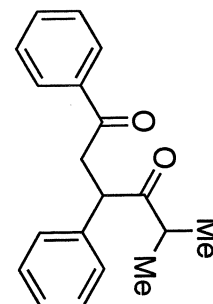

Compound S-18

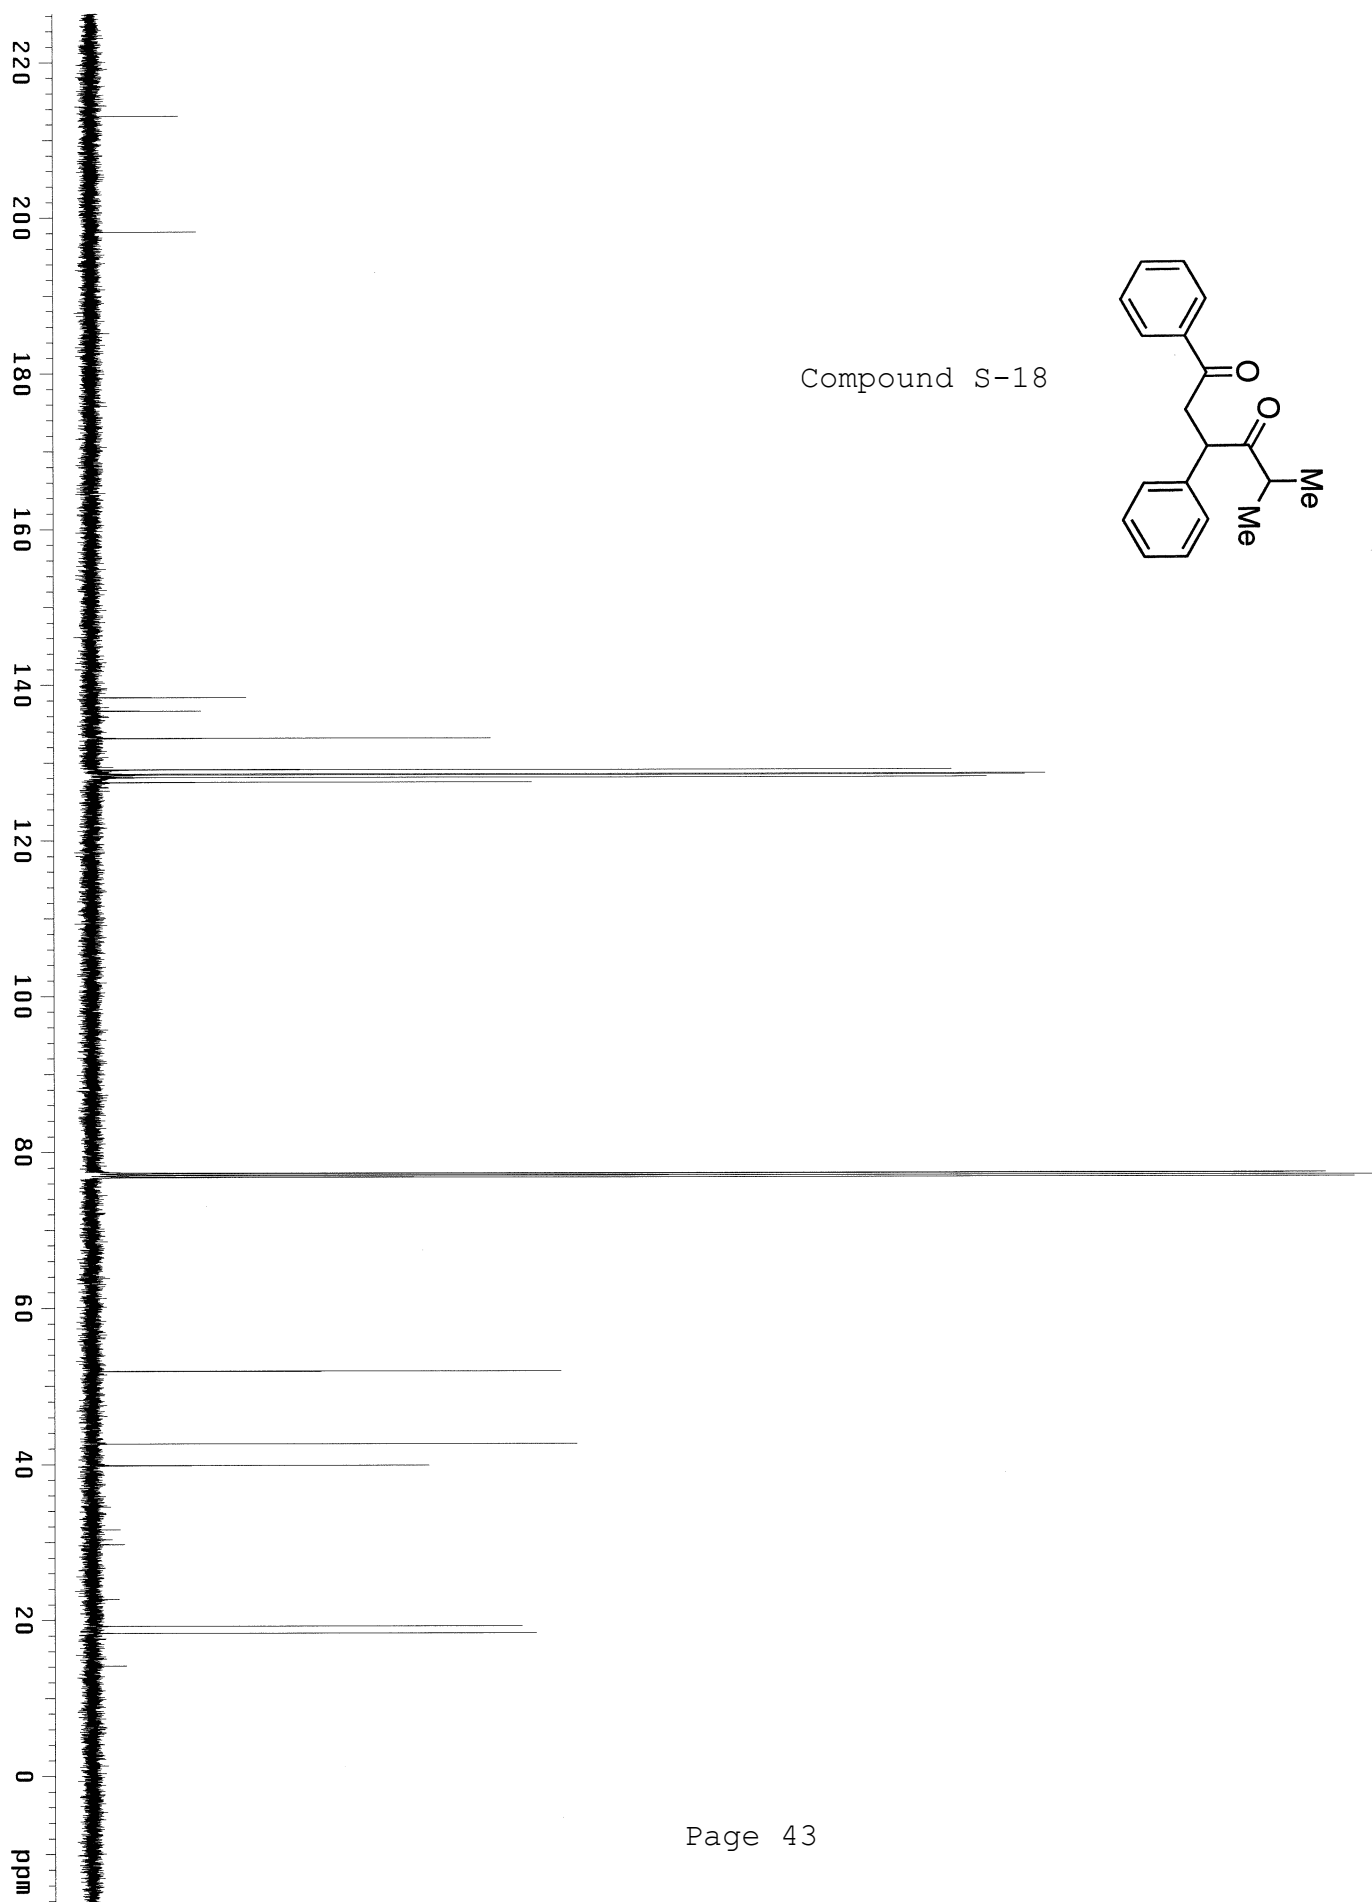

Solvent: CDCl3  
 Ambient temperature  
 GEMINI-400BB "nmr8"  
 Relax. delay 2.000 sec  
 Pulse 40.4 degrees  
 Acq. time 3.000 sec  
 Width 5998.8 Hz  
 16 repetitions  
 OBSERVE HI, 400.0268509 MHz  
 DATA PROCESSING  
 FT size 65536  
 Total time 1 min, 29 sec

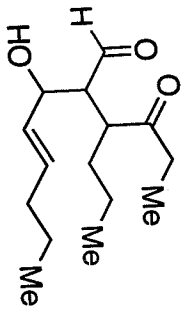

Tentatively Aldol Adduct 5

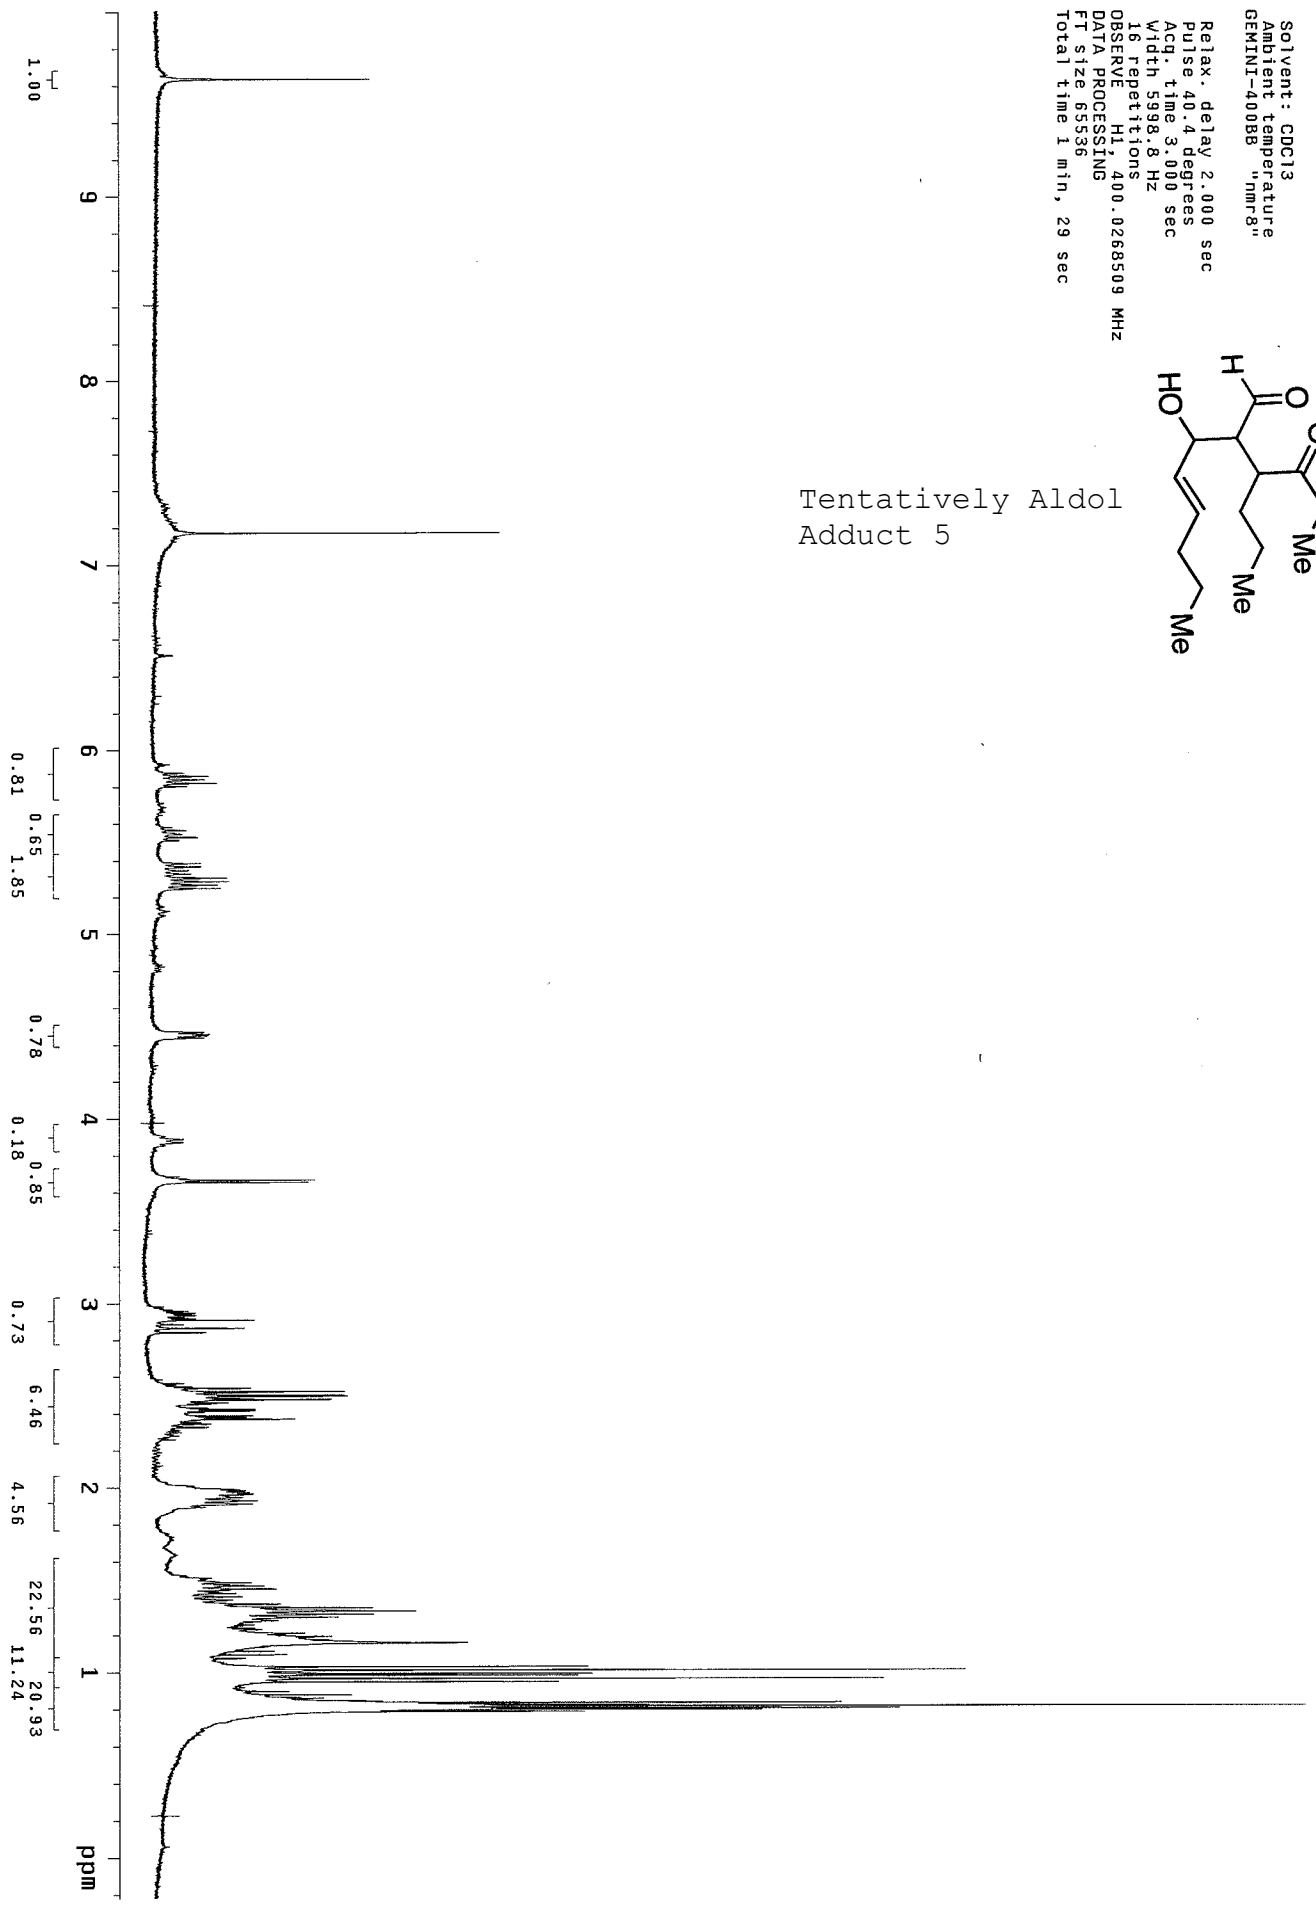

Supplement: NIHMS227192-supplement-1_si_001.pdf [file NIHMS227192-supplement-1_si_001.pdf]
